# Supplementary material for: GPR signature of Quaternary faulting: a study from the Mt. Pollino region, southern Apennines, Italy
Source: Copernicus journal article supplement (doi:10.5194/se-2021-75), 2021-06-14
Supplement: Supplementary file [file se-2021-75-AC3-supplement.pdf]

## **Reply to comment on se-2021-75**

Luca De Siena (Editor)

Editor comment on "GPR signature of Quaternary faulting: a study from the Mt. Pollino region, southern Apennines, Italy" by Maurizio Ercoli et al., Solid Earth Discuss., <https://doi.org/10.5194/se-2021-75-EC1>, 2021

---

Dear authors

Both reviewers have positive comments, considering your study as impactful, with interesting results and interpretations. At the same time, there are some relevant questions you need to address in the revision. Both reviewers provide extensive information on how to amend the text and are clear about what they doubt. Please have particular care in tackling point I) of reviewer 2 - the text needs shortening. I will provide a final revision of the revised paper after the reviewers, focusing on this issue.

Dear editor,

we really thank both reviewers for their positive and constructive comments, which surely will improve our final manuscript. We'll take care of their suggestions in the revised manuscript. Thank you also for your kind support, we'll make our best to shorten more the discussion and conclusions to aid your final revision.

All the best,

Maurizio Ercoli and co-authors
