# Supplementary material for: GPR signature of Quaternary faulting: a study from the Mt. Pollino region, southern Apennines, Italy
Source: Copernicus journal article supplement (doi:10.5194/se-2021-75), 2021-06-14
Supplement: Supplementary file [file se-2021-75-RC2-supplement.pdf]

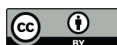

# GPR signature of Quaternary faulting: a study from the Mt. Pollino region, southern Apennines, Italy.

Maurizio Ercoli<sup>1-4</sup>, Daniele Cirillo<sup>2-4</sup>, Cristina Pauselli<sup>1-4</sup>, Harry M. Jol<sup>3</sup>, Francesco Brozzetti<sup>2-4</sup>

<sup>1</sup>: Università degli Studi di Perugia, Dipartimento di Fisica e Geologia, Piazza dell'Università 1, 06123 Perugia, Italy.

<sup>2</sup>: Università "G. d'Annunzio" di Chieti-Pescara, DiSPUTer, via dei Vestini 31, 66100 Chieti, Italy.

<sup>3</sup>: University of Wisconsin - Eau Claire, Department of Geography and Anthropology, 105 Garfield Avenue, Eau Claire, WI, 54702.

<sup>4</sup>: CRUST Centro interUniversitario per l'analisi SismoTettonica tridimensionale, Italy.

Correspondence to: Maurizio Ercoli ([maurizio.ercoli@unipg.it](mailto:maurizio.ercoli@unipg.it); [maurizio.ercoli@gmail.com](mailto:maurizio.ercoli@gmail.com))

**Abstract.** With the aim of unveiling evidence of Late Quaternary faulting, a series of Ground Penetrating Radar (GPR) profiles were acquired across the Campotenesse continental basin (Mt. Pollino region) in the southern Apennines active extensional belt (Italy). A set of forty-nine 300 MHz and 500 MHz GPR profiles, traced nearly perpendicular to a buried normal fault, were acquired and carefully processed through a customized workflow. The data interpretation allowed us to reconstruct a pseudo-3D model depicting the boundary between the Mesozoic bedrock and the sedimentary fill of the basin, which were in close proximity to the fault. Once reviewing and defining the GPR signature of faulting, we highlight in our data how near surface alluvial and colluvial sediments appear to be dislocated by a set of conjugate (west and east-dipping) discontinuities that penetrate inside the underlying Triassic dolostones. Close to the contact between the continental deposits and the bedrock, some buried scarps which offset wedge-shaped deposits are interpreted as coseismic ruptures, subsequently sealed by later deposits. Although the use of pseudo-3D GPR data implies more complexity linking the geophysical features among the radar images, we have reconstructed a reliable subsurface fault pattern, discriminating master faults and a series of secondary splays. We believe our contribution provides an improvement in the characterization of active faults in the study area which falls within the Pollino seismic gap and is considered potentially prone to severe surface faulting. Our aim is for our approach and workflow to be of inspiration for further studies in the region as well as for similar high seismic hazard areas characterized by scarcity of near-surface data.

**Key-words:** Ground Penetrating Radar (GPR); Image processing; Faults; Neotectonics; Palaeoseismology; Earthquake hazards.

## 1. Introduction

A "seismic gap" is a region characterized by active faults that are seismically "silent" during the historical record (Galadini and Galli 2003), but which are considered, on the basis of paleoseismological and/or morpho-structural data, able to generate significant earthquakes (McCann et al. 1979; Mogi 1979; Plafker and Galloway 1989). Although the hypothesis stating that the earthquake potential increases after a long quiet period was rejected by some authors (Kagan and Jackson 1991), in some cases fault segments located in areas of longstanding gaps have revealed their seismic potential, by producing earthquakes of moderate or high magnitude. Late Quaternary activity related to normal faults can be suggested by structural and geomorphological evidence, as happens also in many sectors of the active Italian

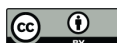

extensional province, but their seismogenic role of such faults is not well understood yet. As shown by the 2016–2017 seismic sequence in central Apennines (Chiari aluce et al. 2017; Galli et al. 2019), the Italian Apennines can be considered an ideal laboratory for all geoscience disciplines studying seismic gaps. This seismic crisis occurred in an area displaced by an alignment of west-dipping Quaternary faults, where no important earthquakes had been recorded over the past 1500 years. Nine-strong and moderate seismic events struck a ~80 km long region, climaxing in the  $M_w = 6.5$  “Norcia” mainshock (Porreca et al. 2018 and references therein; Ercoli et al. 2020), producing extensive surface faulting (Pucci et al. 2017; Civico et al. 2018; Villani et al. 2018; Brozzetti et al. 2019, 2020; Testa et al. 2019; Cirillo 2020). Geological and paleoseismological studies across the faults set were preceding this seismic sequence (Calamita et al. 1992; Brozzetti and Lavecchia 1994; Barchi et al. 2000; Galadini and Galli 2003, Galli et al. 2008). Besides, some years before this sequence, 2D/3D GPR surveys (Ercoli et al. 2013a; 2014) detected a peculiar geophysical signature confirming buried past surface faulting in Holocene deposits, that was not very prominent on the present topography. These studies revealed occurrence of strong paleo-earthquakes and led to consider the Mt. Vettore master fault “silent”, but prone to cause similar strong events in the future. This proves the paleoseismological approach can be of great help in many tectonically active areas of the Apennines. Its systematic application may provide answers on both the seismic potential and the recurrence times (Mc Calpin; Galli et al. 2008, 2019, 2020). But on many active faults, contrary to geophysical surveys, paleoseismological data cannot be carried out systematically due complex logistics, environmental restrictions, the relatively high costs and, authorization processes. In addition, in many terrestrial areas, past coseismic ruptures can be poorly visible at surface, as undergoing to natural or/and anthropogenic topographic “regularization”. Thus, when also other geological, seismological, and geophysical data are scarce, outdated, or not detailed enough for the definition of a satisfactory seismotectonic framework, Quaternary silent faults in “seismic gaps” deserve great attention for local seismic hazard evaluation. For the above reasons, Quaternary faults and associated basins have been and are currently investigated not only Central Italy, but also in the southernmost Apennines sector (Galli et al. 2008; 2020). A dedicated research project (Agreement INGV-DPC 2012–2013 and 2014–2015, Project S1 - Base-knowledge improvement for assessing the seismogenic potential of Italy, Brozzetti et al. 2015; Pauselli et al. 2015) aiming to improve the base-knowledge of seismogenic structures was focused during the 2012–2015 period also on the Calabrian region (Southern Italy).

In the project, structural geological, geophysical, and paleoseismological studies were successfully acquired across the Mt. Pollino and Castrovillari fault systems (northern Calabria), supporting evidence of their Late Quaternary activity (Ercoli et al. 2013b; Cinti et al. 2015, Ercoli et al. 2015; Brozzetti et al., 2017b). This area, which is considered one of the most important seismic gaps in southern Italy, extends northward to include the Mercure and Campotenese basins, both characterized by Late Quaternary continental syn-tectonic sedimentation (Fig. 1a–c).

The fresh geomorphic signature of the faults bounding these basins suggests Late Quaternary activity; besides, paleoseismological trenching and radiocarbon dating document the occurrence of  $M_w > 6.5$  paleo-earthquakes (Cinti et al. 1997, 2002; Michetti et al. 1997, 2000). But the data contrasts with the poor historical seismicity, reporting a single significant  $M_w = 5.6$  event occurred in 1693 (Guidoboni et al. 2018) and, ultimately, also with instrumental seismicity characterized by two moderate seismic sequences respectively climaxing in the  $M_w 5.6$  Mercure (1998, September 9) and  $M_w 5.2$  Mormanno (2012, October 25) earthquakes. The latter occurred during a long-lasting sequence spanning the period 2010–2014, which included more than 6000 seismic events of  $M_w > 1$  and activated at least three individual seismogenic sources (Passarelli et al., 2015; Brozzetti et al., 2017a; Cirillo et al., 2021; Fig. 1b). The gap between the low energy release, observed during the instrumented seismic sequences, and the high seismic potential estimated for the Quaternary faults, raised the question of whether even stronger earthquakes had shaken and



could shake the area in the future. A recent and detailed parameterization of the Fosso della Valle-Campotenese fault (VCT), that bounds a homonym basin (Fig. 1c) showing both geological and seismological evidence of current activity (Totaro et al. 2014, 2015; Brozzetti et al. 2017a, Cirillo et al., 2021), assesses a surface length of ~15 km and a depth of at least 10 km (Brozzetti et al. 2017a; Cirillo et al., 2021): the potential rupture-area is likely estimated to produce  $M_w > 6.0$  earthquakes. Such seismic events, in the Apennines extensional belt, are generally considered capable of producing coseismic surface breaks (Pantosti and Valenzise 1990; Cello et al. 2000; Vittori et al. 2000; Boncio et al. 2010; Villani et al. 2018; Brozzetti et al. 2019). However, evidence of Quaternary faulting for this structure is currently unclear, but geological and morpho-structural data suggest this fault has played an important role in determining the geometry and the recent sedimentary evolution of the basin.

The Campotenese basin and its VCT boundary fault is an emblematic example that summarizes the aforementioned issues: 1) unavailability of paleoseismological data as the basin is entirely located within the Mt. Pollino National Park, thus requiring prior authorization from competent authorities; 2) unavailability of publically geophysical data; 3) no fresh surface displacements of Holocene deposits, suggesting the occurrence of recent strong earthquakes, have been observed so far along its trace.

For all these reasons, the VCT represents an ideal case study suitable to test our working method, as it we have conducted an explorative GPR campaign as a screening tool for the detections of potential unknown Quaternary coseismic ruptures along its fault zone. It is possible that, during past strong earthquakes, propagation of coseismic ruptures along the fault could have displaced Holocene deposits at the surface, being subsequently buried by further and more recent alluvial deposits or erased by the anthropogenic and agricultural activity. The objectives of the project are to: i) review and describe geophysical characteristics associated with a peculiar GPR signature of faulting, and propose a methodological GPR workflow for the study site which might be extended to other areas; ii) check the efficiency of a GPR prospection in the Campotenese study site to locate the trace of the studied fault as well as verifying its spatial continuity at depth; iii) provide new data to relate to the occurrence of  $M_w > 6.0$  events on the VCT, as observed for the nearby Castrovallari faults; iv) highlight new elements for more exhaustive characterization of the VCT with the purpose of better quantifying its seismogenic potential; v) pave the way for other local geophysical prospections and identify interesting sites for future ground-truthing and/or paleoseismological trenching; vi) to have direct application and impact to the planning of future mitigation strategies for the reduction of surface faulting risk in the nearby urbanized areas.

## 2. Tectonic setting and seismicity

The Campotenese continental basin is located in the northernmost Calabria region south-west of the Mt. Pollino calcareous massif (southern Italy, Fig. 1). The bedrock of the basin consists of shallow water dolostones and limestones, Late Triassic to Middle Miocene in age, belonging to the Verbicaro tectonic unit (Ogniben 1969; Amodio Morelli et al. 1976). It is generally referred to the western edge of the “Apenninic Platform”, a thick (>4 km) carbonate shelf, that underwent compression during the Middle-Late Miocene times and was translated over an eastern basinal domain (Lagronegro-Molise basin; Patacca and Scandone 2007; Vezzani et al. 2010 and references therein). From the bottom to the top, the bedrock succession includes late Triassic dolostones, Cretaceous limestones, and Paleocene-Lower Miocene calcarenites cross-cut by the pillow lava basalts belonging to Liguride units of the northern sector of Calabrian arc (Quitow 1935, Grandjaquet and Grandjaquet 1962, Amodio Morelli et al. 1976, Ghisetti and Vezzani, 1983; Iannace et al. 2004, 2005 and 2007; Liberi et al. 2006; Filice et al. 2015 and Tangari et al. 2018).

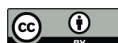

119 The origin of the Campotenese basin, however, is related to a set of NW-SE striking extensional faults which, during  
 120 the Middle-Late Pleistocene, displaced the contractional tectonic pile, favoring the deposition of alluvial and lacustrine  
 121 sediments in a subsiding intra-mountain depression (Servizio Geologico d'Italia 1970). This set of conjugate SW- and  
 122 NE-dipping normal faults represents the local expression of the Quaternary extensional belt that develops all along  
 123 the Italian peninsula, nearly parallel to the axial zone of the Apennines, from northern Tuscany to the Calabrian Arc  
 124 (Brozzetti 2011). North of Campotenese, (Lucania and southern Campania) the Apennine extensional belt includes  
 125 several continental basins and their boundary faults, as the Irpinia, Vallo di Diano, Tanagro, Melandro-Pergola and  
 126 Val d'Agri (Ascione et al. 1992; Maschio et al. 2005; Amicucci et al. 2008; Villani and Pierdominici 2010; Brozzetti  
 127 2011; Filice and Seeber 2019 and Bello et al. 2021). To the south, it continues with the Crati graben that dissects the  
 128 northern sector of the Calabrian Arc (Tortorici et al. 1995; Brozzetti et al. 2017b).

129 On the regional scale, the Quaternary normal fault array controls the release of major seismicity, as suggested by the  
 130 distribution of supra-crustal instrumental earthquakes (INGV 2020 and Iside, 2007) and of the strongest historical  
 131 events (Fig. 1a, Tertulliani and Cucci 2014; Rovida et al. 2020). Several **seismological** and paleo-seismological  
 132 investigations claim that most of the faults bounding the Quaternary basins are seismogenic and therefore enable, in  
 133 some cases, to associate major past earthquakes with specific structures (Pantosti and Valenzise 1990; Cello et al.  
 134 2003; Galli et al. 2006; Spina et al. 2008; Brozzetti et al. 2009; Villani and Pierdominici 2010; Brozzetti et al. 2017a).  
 135 These same studies highlight that the kinematics of the Quaternary faults and the focal mechanisms of the major  
 136 earthquakes are mutually consistent and are compatible with an SW-NE direction of extension (RCMT and TDMT  
 137 databases by Pondrelli, 2002 and Scogliamiglio et al. 2006).

138 **The area investigated in this work and the structures** bounding the Campotenese basin have been pointed out recently  
 139 in more detail by Brozzetti et al. (2017a), in the frame of a larger study of the Quaternary and active fault pattern on  
 140 the Calabria-Lucania border (Fig. 1b,c). In the region, three main sets of normal faults have been mapped: a western  
 141 one, consisting of east- to NNE-dipping faults (red lines in Fig. 1b), and two other main sets of W-to SW-dipping fault  
 142 segments (blue lines in Fig. 1b). The Campotenese Fault (VCT) is the westernmost splay of a SW-dipping fault referred  
 143 to as **Rotonda - Campotenese fault**, which develops in a N160E average strike-direction and includes several **right-**  
 144 **stepping en-echelon segments** (Fig. 1b). The VCT extends from the southern border of the Mercure basin to the SW  
 145 boundary of the Campotenese basin (average strike ~N155E) for ~15 km. Across its northern segment, an associated  
 146 throw of ~120 m has been assessed based on the displaced stratigraphic boundaries mapped within the bedrock  
 147 (passage between Triassic dolostones and Jurassic limestones). In this same sector, prevailing dip-slip kinematics has  
 148 been documented by Brozzetti et al. (2017a). Along the east side of the Campotenese basin, the VCT is generally  
 149 buried by Holocene deposits, but its localization can be inferred based on stratigraphic observations and geomorphic  
 150 features, such as sharp ridge fronts, linear scarps, and slope breaks. The VCT controls the distribution and thickness  
 151 of the clastic fill basin (Middle Pleistocene-Holocene in age, according to Schiattarella et al. 1994) that reaches the  
 152 maximum thickness (> 30 m) in the western sector (VCT hanging wall, see boreholes stratigraphy at  
 153 <http://sgi2.isprambiente.it/mapviewer/>) whereas is very thin (generally < 2-3 m) in the eastern one. The spatial  
 154 relationships, at surface and depth, between the Quaternary fault segments, and the hypocenters of the re-located  
 155 events of the 2010-2014 seismic activity (Totaro et al. 2015; Brozzetti et al. 2017a; Napolitano et al. 2020, 2021;  
 156 Pastori et al. 2021) suggest that the VCT is a good candidate as a seismogenic source for the Mw 5.2 (2012, October  
 157 25) Mormanno mainshock. **In addition, the analysis of the historical seismicity highlights that the epicenter of the Mw**  
 158 **5.5, 1708 earthquake (Rovida et al. 2020) is located within the VCT hanging wall block, close to its northern**  
 159 **termination, leading to hypothesize the possibility of a common seismogenic source with the Mormanno 2012 event**



160 Ultimately, based on the available data (e.g. Brozzetti et al. 2017a), the VCT must be considered an active and  
 161 seismogenic fault, whose size (length of surface trace and depth of detachment) provides an estimate of seismogenic  
 162 potential much greater than that released over the last few centuries, thus capable of giving surface faulting in the  
 163 future. Following this line of reasoning, it is hypothesized that some strong paleo-earthquakes, unknown to date, may  
 164 have caused, along the VCT trace, coseismic surface breaks that are currently no longer visible as they have been  
 165 leveled by erosion and anthropogenic activity. The search for evidence of such possible paleo-ruptures is therefore a  
 166 fundamental first step to define the actual seismogenic potential of the VCT and perhaps, to try filling in the Pollino  
 167 seismic gap.

168 FIGURE 1 HERE

### 169 3. Methodology

170 Ground Penetrating Radar (GPR) is a high-resolution geophysical method able to provide detailed images of the  
 171 shallow sub-surface. This methodology is based on the recording of Em echoes, with operative frequencies for  
 172 geoscience applications generally between 10 MHz and 1000 MHz, depending on the transmitting and receiving  
 173 antennae. The GPR reflections rise from dielectric permittivity contrasts between the subsurface targets and the  
 174 surrounding media, which in geological and archaeological applications typically correspond to geo-lithological  
 175 changes or water content variations (Jol 2009). In “low-loss” materials (Davis and Annan 1989), the investigation  
 176 depth range is generally within the first ten meters or less. The latter is however controlled also by the electrical  
 177 conductivity, which for high values causes radar signal attenuation (Annan 2001). The reflections are recorded as a  
 178 function of the Two-Way-Travel time (TWT) propagation, and displayed as a 1D GPR trace. Several GPR traces  
 179 displayed along a transect build-up a radar profile or “radargram”, that is the 2D representation of the GPR reflections,  
 180 more commonly identified as the conventional GPR output. A GPR dataset may be provided also as a 3D volume,  
 181 which has been common for 25+ years in research applications and recently more widespread due to a wider diffusion  
 182 of commercial GPR instruments equipped with arrays of antennae. The GPR is used in many research and applied  
 183 fields, such as geological, sedimentological, hydrogeological applications (Bristow and Jol. 2003; Jol 2009), and also  
 184 in archaeological and engineering studies (Conyers 2006, 2016; Daniels 2004; Goodman and Piro 2013; Utsi 2017).  
 185 Several 2D/3D GPR studies have already imaged buried tectonic structures. These studies have shown geophysical  
 186 images of faulting, supporting and/or extending outcrop, borehole, trench data, and contributing to base-knowledge  
 187 of seismogenic structures as well as to the seismic hazard assessment of several regions around the world. Among the  
 188 pioneers, we can mention Benson (1995), Smith and Jol (1995), Busby and Merritt (1999), Cai et al. (1996) and Liner  
 189 and Liner (1997), and on the successive twenty years, other 2D GPR studies were achieved across several faults  
 190 (Audru et al. 2001; Demanet et al. 2001; Overgaard and Jakobsen, 2001; Bano et al. 2002; Liberty et al. 2003; Reiss  
 191 et al. 2003; Slater and Niemi, 2003; Malik et al. 2007; Wallace et al. 2010; Yalciner et al. 2013; Imposa et al. 2015;  
 192 Anchuela et al. 2016; Nobes et al. 2016; Matos et al. 2017; Pousse-Beltran et al. 2018; Zajc et al. 2018; Zhang et al.  
 193 2019 and Shaikh et al. 2020). A few GPR surveys have been acquired across Italian normal faults (Salvi et al. 2003;  
 194 Jewell and Bristow, 2006; Pauselli et al. 2010; Roberts et al. 2010; Ercoli et al. 2013a; Bubeck et al. 2015; Cinti et al.  
 195 2015). Over time, such 2D GPR studies were flanked by an increasing number of pseudo-3D or full-3D GPR studies  
 196 (Grasmueck et al. 2005). Grasmueck and Green (1996) traced the future path of three-dimensional GPR applications,  
 197 providing a dense 3D GPR volume to image fractures in a Swiss quarry. The study opened the possibility to three-  
 198 dimensional GPR imaging of subsurface geological structures. Successive studies extended the approach to



characterize active faults in different tectonic regimes combining 2D and pseudo-3D GPR surveys (Gross et al. 2000, 2002, 2003, 2004; Green et al. 2003; Horstmeyer et al. 2005; Tronicke et al. 2006; McClymont et al. 2008, 2009, 2010; Vanneste et al. 2008; Christie et al. 2009; Carpentier et al. 2012a,b; Malik et al. 2012; Brandes et al. 2018). A review of the near-surface GPR faulting studies suggests some reflection characteristics as possible indicators for the detection of subsurface fractures and faults (e.g. Smith and Jol 1995; Liner and Liner 1997; Reiss et al. 2003; Gross et al. 2004; McClymont et al. 2008, 2010 and Bubeck et al. 2015). Among these, sharp lateral reflectivity variations, interruptions of the reflections, and the presence of hyperbolic diffractions are considered convincing evidence, as shown also by numerical simulations (Ercoli et al. 2013a; Bricheva et al. 2021). In addition, we have accounted for additional GPR indicators identified for Quaternary faulting in similar environments (Ercoli et al. 2013a,b; 2014; 2015), which are linked to the geometry of stratigraphic deposits across fault zones: i) reflections abrupt truncating and offsetting along sub-vertical discontinuities (especially in the case of a normal fault); ii) reflection packages thickening as they approach the fault strands; iii) abrupt lateral dip variation of the reflections; iv) peculiar reflection package geometries, with contorted reflection patterns resembling “*colluvial wedges*”, which McCalpin (2009) defines as deposit due to “*subsidence and sedimentation of the hangingwall and erosion of the morphological scarp in the footwall*”; v) localized strong GPR signal attenuation due to the presence of conductive media within the main fault zone (possibly associated with colluvial wedges). Based on the research and criteria reviewed above, we carried out our interpretation of near-surface faulting based on the co-existence of most of these features along several adjacents analyzed GPR profiles. These conditions strengthen the interpretation of each profile and aids to highlight the spatial continuity of the interpreted structures over linear distances of at least many tens, or hundreds, of meters.

### 3.1 GPR and GNSS survey

The GPR profiles were acquired across the VCT fault (Fig. 1c), during three different geophysical campaigns in the years 2014-2015 (Fig. 2). The entire dataset encompasses 49 radar profiles (linear length of about 4100 m) collected with a Common Offset (CO) configuration.

FIGURE 2 HERE

We used a Zond 12e GPR system equipped with 300 and 500 MHz antennae. The lower frequency antennae was ultimately preferred and considered the best trade-off between maximum resolution and achievable signal penetration (in our case ~ 4 m) concerning the surveyed materials and wanted subsurface structures. The GPR was equipped with an odometer wheel to measure the radar profiles’ length and with a Topcon GR-5 Global Navigation Satellite System (GNSS) receiver to achieve accurate positioning of GPR traces and profile. Considering the scarce presence of obstacles across the survey site and the good satellite coverage, we opted for a Network Real-Time Kinematic positioning (NRTK, connected to the NETGEO network), measuring coordinates and elevations with centimetre accuracy, and stored directly within the SEG-Y GPR files.

Three datasets were acquired after preliminary fieldwork and collection of geological structural data at the surface and which allowed us to infer the possible location of the fault trace. The average NE-SW direction of the GPR lines was initially planned with the primary purpose of intersecting the VCT fault ~perpendicularly to its SW-NE strike, as reported by literature and visible by surface evidence. This solution theoretically allows a more reliable interpretation

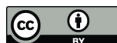

236 of the investigated structure by reducing the effect of the apparent dip-direction and dip-angle of both stratifications  
 237 and faults.

238 The first acquisition carried out in 2014, resulted in twelve SW-NE GPR profiles collected in the southern sector  
 239 (CMT light-blue lines in Fig. 2a), which was a flat land characterized by Quaternary alluvium. The second acquisition  
 240 encompassed four additional radar profiles collected in the same area, and another nine radar profiles progressively  
 241 moving to north, which were collected with slightly different and converging orientations in the central sector (CMT  
 242 green lines Fig. 2a). This solution was pursued for two main reasons: 1) to avoid directly surveying the outcropping  
 243 dolostones (only partially crossed with two northernmost profiles) characterizing two hills  $h1$  and  $h2$  (dashed white  
 244 polygons in Fig. 2), thus focussing only on the sedimentary cover which is our target for possible Quaternary faulting;  
 245 2) to optimize, using subsurface data, the future acquisition schemes by figuring out the effective “apparent dip” of  
 246 the geologic structures, to consider in the interpretation of 2D GPR images (similar to the interpretation of reflection  
 247 seismic profiles).

248 In order to intercept several possible buried faults and fault-related structures as well as to fully image the local  
 249 structural setting, the successive 2015 acquisition crossed part of the Triassic dolostones ridge with longer GPR  
 250 profiles. Preliminary results shown by GPR profiles collected during the second 2014 campaign (close to  $h1$  and  $h2$ )  
 251 revealed a considerable difference in GPR reflectivity between the unconsolidated deposits and layered and fractured  
 252 Mesozoic lithotypes (Gafarov et al. 2018). Therefore, two new datasets of 24 GPR parallel radar profiles (CMT dark-  
 253 blue sets of lines in Fig. 2a, north “ $n$ ” and south “ $s$ ”) were extended in NNE-SSW and NE-SW directions,  
 254 respectively, crossing  $h1$  for several tens of meters (max profile length ~220 m) throughout the basin. The GPR profiles  
 255 were recorded using a trace distance of 0.05 m and a profile inter-distance of 10 m for dataset “ $n$ ” and 25 m for dataset  
 256 “ $s$ ”, respectively. A detailed summary of the acquisition parameters used in the field during the GPR surveys is  
 257 reported in Table I. For these two new grids, the profile spacing and positioning are more regular and accurate, thanks  
 258 to a preparatory transects planning using a Geographic Information System Information System (GIS) project. Thus,  
 259 we later staked out their initial and final positions during the fieldwork through the differential Global Navigation  
 260 Satellite System (GNSS). The results of the accurate GPR traces positioning achieved during the GNSS campaigns  
 261 were later used also for GPR data processing, visualization, and interpretation.

262 TABLE 1 HERE

### 263 3.2 GPR data processing and results:

264 The processing sequence was customized after testing several flows and parameters. We aimed to remove random and  
 265 coherent (e.g. ringing) noise and enhance the data quality to better visualize the geometry of the buried reflections and  
 266 their discontinuity in signal amplitude and phase. The first step was an accurate Quality Control (QC) of the profile  
 267 coordinates and topographic profiles. Although the favorable environmental conditions of the site for a GNSS survey,  
 268 some measurements were occasionally suffered a degradation of positional accuracy (e.g. temporary scarce satellite  
 269 coverage or poor communication via Network Transport of RTCM via Internet Protocol - Ntrip). For some traces  
 270 therefore the coordinates and elevation field records that were outliers were corrected using various strategies (e.g.  
 271 replacement, interpolation, or smoothing, Figs. 3a,b).

272 FIGURE 3 HERE





We have also compared our measurements with topographic transects extracted from a 10 m and a 5 m resolution Digital Terrain Models (DTM) by Tarquini et al. (2012) and by Regione Calabria. Later on, we finally used a 1 m resolution DTM (Geoportale Nazionale, Lidar data provided by Italian Ministero dell'Ambiente e della Tutela del Territorio e del Mare - MATTM) to double-check if, despite the different scales of observation, the topographic profiles were comparable. Although the metre resolution of the DTM is unable to represent centimetre topographic variations, the comparison confirmed an excellent match of the topographic profiles at a meter scale, so that the DTM data were integrated to correct the GNSS measured topography when the accuracy of GNSS recordings were excessively degraded. With the topographic profiles corrected, the raw GPR data (Fig. 3c, illustrating the profile cmt5s) were initially processed with the Prism software (Radar System, Inc., <http://www.radsys.lv/en/index/>) using a basic processing sequence, to analyze the main characteristics of data and optimize a customized processing flow. The processing sequence was later improved through ReflexW software (<https://www.sandmeier-geo.de/reflexw.html>, see Table II for details on the processing algorithms and parameters). The workflow included a time-zero correction, dewow, amplitude recovery, velocity analysis, background removal, bandpass filtering, F-K filtering, 2D time migration, topographic correction, and time-to-depth conversion. The amplitude recovery was operated through a "gain function" including by a linear and an exponential coefficient ( $g(t)=(1+a*t)*e^{(b*t)}$ ) to enhance the amplitude (reflectivity) contrasts as well as preserving the horizontal and vertical amplitude variations already visible in the raw data (Fig. 3a). This amplitude recovery function was used across all the profiles with slight customization depending on the datasets (details in table II). The entire processing flow was applied to all the available radar profiles, again with occasional filtering adaptations aiming to remove local pervasive signal ringing (e.g. due to low antennae-ground coupling). Particular care was dedicated to the migration process, whose algorithm was decided after extensive tests on several radar profiles to select the best migration strategy.

TABLE 2 HERE

In fact, a very different reflectivity and maximum depth of penetration are visible in the data: it is more than 150 ns in the central sector, reducing to 70-80 ns in the rest of the radar profiles (Fig. 3c): this fact suggests sharp lateral variations of subsurface media (Figs. 3d) and possibly of the velocity field. Thus, we have first tested a 1D time migration algorithm (Kirchhoff) performing a Migration Velocity Scan (MVS) analysis (Forte and Pipan 2017) and inspecting the success of diffraction hyperbola collapse after migration. We have varied constant values of  $v$  velocity, from a minimum of 0.06 up to 0.12 m/ns, with steps of 0.01 m/ns, to evaluate considerable variation in dielectric properties of surveyed media. The MVS highlighted a higher velocity for the central sector of the GPR profiles which displays high reflectivity: Fig. 4 illustrates an extract of the migration results obtained on the profile cmt1n\_a, by using three constant values of average velocity. The profile in Fig. 4a shows the unmigrated version characterized by numerous hyperbolic and half hyperbolic diffractions originated by single scatter points and wavy reflections (white arrows). In Fig. 4b we display the first test using  $v = 0.07$  m/ns, showing overall good results, with slightly under-migration at a few points mainly located within the shallower sediments (light-blue arrows). The hyperbolic diffractions are also nicely collapsed using higher velocity ( $v = 0.09$  m/ns) as shown in Fig. 4c (dark-blue arrows), even if some imaging problems are rising on deeper reflections. The last migration scan test ( $v = 0.11$  m/ns) displays a good result only in few profile sectors (dark-blue arrows), particularly localized within the sectors with high reflectivity, displaying an improved lateral reflection continuity. The rest of the radar profile shows general poor





imaging, particularly in the area characterized by strong attenuation, where the wavy reflection is clearly over-migrated (red arrows indicating migration smiles, Fig. 4d).

FIGURE 4 HERE

The workflow, therefore, suggests a challenging imaging task, due to velocity variation happening not only in depth as well as laterally across the different media. This sharp change of reflectivity and velocity at a distance of about 13-14 m (Fig. 4d) represents a complex problem for the efficiency of 1D migration algorithms standardly used for GPR imaging. Such considerations have driven to test a 2D migration algorithm, by creating and using a 2D velocity model obtained for each radar profile through a hyperbolic diffraction fitting tool (Fig. 5a). Single velocity points have been fitted for each area clearly displaying hyperbolic diffractions, while in the remaining parts of the radar profiles we have arbitrarily included presumed velocity adaptation only to obtain a regular grid of points to spatially interpolate the 2D models. The 2D migrated radar profiles, in comparison to the 1D approach, resulted in improved imaging of GPR profiles, displaying a more accurate collapse of the hyperbolic diffractions into point sources and an improved relocation of dipping reflections, with a refinement of their geometry and an increase of their continuity. A good-quality imaging result is visible on the central sectors of radar profiles displaying strong reflectivity and reflections with improved continuity, but also many phase breaks and displacements. Despite steep topographic gradients, sharp lateral velocity variation and the reflection heterogeneity might cause imaging issues to be treated using more specific workflows (Lehmann and Green, 2000; Heincke et al. 2006; Goodman et al. 2007; Dujardin and Bano 2013), we believe we have reached a good compromise for our purposes. In our case, a considerable improvement, can be seen along the hill-slope and flatter areas (profile cmt1n\_a, Fig. 5b) which are of greatest interest for the study aimed at detecting possible earthquake ruptures within the Quaternary deposits. The improved imaging of reflection geometries is therefore fundamental for the interpretation and detection of geophysical signatures of faults.

FIGURE 5 HERE

A successive import of the processed SEG-Y was done into the seismic interpretation software OpendTect Pro v.6.4 (Academic license courtesy of dGB Earth Science, <https://www.dgbes.com>), which was used first for global quality control of processing operations (correctness of topographic correction and datum plane, coordinates accuracy and matching, profiles orientation and intersection) and for three-dimensional (3D) visualization of all the profiles (Fig. 6a).

The three-dimensional GPR project was subsequently integrated with geological and structural maps, DTM, and literature schemes (using a common Coordinate Reference System: WGS84 UTM Zone 33N, EPSG: 32633) in the Move suite software v. 2019.1 (Academic license courtesy of Petroleum Experts, <https://www.petex.com/>) for the GPR interpretation and model building. All the east and west-dipping fault surfaces were created interpolating the fault-sticks picked on displaced reflections and correlated across adjacent radar profiles. In particular, we used the "surface geometry" tool to extract the properties of each single mesh building up the surfaces, and obtaining the "dip" and "dip azimuth" data. Subsequently, such values have been automatically saved in an attribute table, which can then be queried to reconstruct the "synthetic" stereonets.

#### 4. GPR data description and interpretation



347 The 3D MOVE project allowed us to extract 2D and 3D visualizations of the radar profiles acquired across the VCT  
 348 fault trace and allows us to better figure out the relationships between the main reflections identified on the different  
 349 GPR data (Fig. 6a). The workflow aimed to reconstruct and model the three-dimensional surfaces including horizons  
 350 and high-angle discontinuities.

351 FIGURE 6 HERE

352 A common feature on all the radar profiles is the strong reflectivity visible within their central sectors (profile cmt3n,  
 353 Fig. 6b), which are characterized by a more irregular and steeper slope, particularly within the northern portion of the  
 354 surveyed area. These sectors with deep penetration areas are caused by the Triassic dolostones, which outcrop in the  
 355 central and northern portions of the study area (Figs. 1c and 2a). In the southern side of *h1*, thin microbialitic laminae  
 356 allows one to measure the attitude of the bedding, which shows a NNW dip ( $\sim 30\text{-}35^\circ$ ). In the same area, we measured  
 357 two sets of major and minor joints, both with a dip angle of  $\sim 40\text{-}45^\circ$  and a SW and SE dip, respectively.  
 358 Looking at the quality of the radar reflections and at the remarkable depth ( $\sim 6$  m, Fig. 6b) reached by the GPR signal,  
 359 this rock type represents an excellent dielectric medium (corresponding to higher frequency content zone in the 2D  
 360 spectrum of Fig. 6c). However, its reflection pattern is not spatially homogenous, being often characterized by oblique  
 361 and sub-parallel reflections interpretable as dolostone beds, displaying moderate ( $25\text{-}30^\circ$ ) west and east “apparent”  
 362 dip on the respective sides of the surveyed dolostone hills. In addition, these reflections are frequently cut and slightly  
 363 displaced by apparent high-angle ( $60\text{-}65^\circ$ ) phase discontinuities, also highlighted by a dense hyperbolic diffractions  
 364 pattern (radar profile cmt2n, Fig. 7a), interpreted as sets of joints or minor faults fracturing and displacing the  
 365 dolostone layers (Fig. 7b). Apart from its internal heterogeneities, the GPR signature of the Triassic dolostones can be  
 366 considered as a well-defined depositional facies (*fc1*) (Sangree and Widmier 1979; Huggenberger 1993; Beres et al.  
 367 1999; Jol and Bristow 2003). This radar signature was recorded not only in correspondence of the outcropping  
 368 carbonates but also in the transition slope areas, where just a thin soil layer or a scarce sedimentary cover was present  
 369 onsite (Figs. 7b,c). A different GPR facies (*fc2*) is characterized by laterally-continuous and sub-parallel prominent  
 370 reflections in the very shallow depth, just beneath the direct arrivals ( $< 1$  m), which stratigraphically seals the  
 371 underlying reflections; more discontinuous, wavy and contorted reflections of moderate to low reflectivity are visible  
 372 in the 1-3 m depth-range (variable across the analyzed profiles) onlapping onto a generally prominent and wavy  
 373 reflection (Figs. 7a,b). Below this reflection pattern ( $\sim 2\text{-}3$  m), the signal strongly attenuates. Summarizing, the  
 374 shallower reflections packages show continuous beds dipping parallel to the slope, but under these, the slightly deeper  
 375 reflections are less continuous, displaying variable dip and locally a contorted pattern, with numerous diffraction  
 376 hyperbolas (in unmigrated data, Fig. 7a) as well as important lateral amplitude variations (Fig. 7b).

377 FIGURE 7 HERE

378 We have classified the overall radar signature of these reflection packages as facies *fc2*, corresponding to the  
 379 alluvial/colluvial deposits (Fig. 7b,c,d) outcropping on the flatten sectors, which represent the GPR profile sectors  
 380 we’ve carefully inspected to find for geophysical evidence of Quaternary faulting. A key-layer for this research is in  
 381 our opinion the described wavy reflection, recognized in several radar profiles. This prominent reflection shows  
 382 frequently a stepped geometry, with frequent breaks of its continuity and lateral depth variations; moderate to strong  
 383 signal attenuation generally underlies this reflection. The related interpretation is not straightforward in the absence  
 384 of direct data (e.g. boreholes and/or paleoseismological trenches) or at least without additional geophysical data. A



strong reflection suggests significant variation of a dielectric constant between the two media so that most of the incident energy is reflected back to the receiver at the surface, which is potentially explained by several geological models, such as: i) a high dielectric contrast may be a result of a sharp soil moisture variation (Ercoli et al. 2018); ii) a sharp erosional, stratigraphic or tectonic boundary within heterogeneous deposits (Ercoli et al. 2015), or iii) a contact between two considerably different lithologies, such as unconsolidated deposits laying above a bedrock substrate (e.g., Frigeri and Ercoli 2020) reflecting back all (or almost all) the incident signal. In addition, the possible role of conductive sediments within layered deposits (e.g. high clay content) should not be discounted, and it might explain localized strong signal attenuation.

To support the GPR data interpretation, some suggestions for consideration are: 1) stratigraphy of two water-wells located only ~2.5 km away on the north-westernmost sector of the Campotese basin (Brozzetti et al. 2017a); 2) geomorphological and geological data achieved through aerial-photo interpretation and field study on the surrounding landscape (Brozzetti et al. 2017a); 3) the geometrical characteristics shown by this reflection and of the underlying reflection pattern visible in the processed data.

The available well logs show the Pleistocene-Holocene alluvium and colluvium layered above the carbonate bedrock ~20-30 m depth (Brozzetti et al. 2017a), a greater depth than the strong GPR reflection. However, it should be observed that the drilled area is located over the depocenter of the basin whereas the studied GPR site is placed just on its eastern border, in proximity to emerged calcareous hills. In addition, it should be mentioned that only terraced Middle-Pleistocene silts and sands (Schiattarella et al. 1994) and slight coatings of Late Pleistocene colluvium (generally < 2 m thick) are documented to outcrop in the eastern sector of the basin (footwall of VCT fault) (see Fig. 7 in Brozzetti et al. 2017a).

The subsurface geometries highlighted by the GPR profiles suggest a relatively thin layer of sedimentary deposits resting on a fractured substratum, whose top surface is progressively deepening towards the west, thus providing increased space for settling sediments. For this reason, a gradual deposits thickening is observed from east to west. Therefore, we interpret the prominent and wavy GPR reflection as a buried top layer of carbonate (e.g. as observed by Bubeck et al. 2015), in our case the Upper Triassic dolostones formation lying beneath shallow and poorly consolidated Quaternary deposits. Thus, in this surveyed sector of the basin, we interpret the dolostone top to be located not ~20-30 m deep as in the north-westernmost area, but at a shallower depth (1-3 m) below the topographic surface and across both two sides of the surveyed hills. After picking this strong reflection in all the radar profiles, we have therefore reconstructed the top of bedrock surface (Fig. 8a).

We can now focus on the structural interpretation by analyzing the geophysical characteristics of this strong reflection. As illustrated by a recent structural map of the basin in Fig. 8a (modified after Brozzetti et al. 2017a), the area is dissected by a set of en-echelon fault splays connected to the VTC master fault. The strong reflection interpreted as the dolostone top shows a clear “stepped” geometry (Figs. 5b-6b-7b-8b), highlighting abrupt lateral variations in depth and in its thickness (sediment growth and onlaps). We also notice other geophysical features, which can be observed in the stratigraphy of overlying deposits: some reflections are semi-continuous to discontinuous (sharp variation in signal amplitude and phase), displaying lateral dip variation.

FIGURE 8 HERE

In some sectors these broken reflection packages present truncations (Smith and Jol 1995), vertical offset, and hyperbolic diffraction events. Contorted reflections across the main discontinuities frequently show localized strong



attenuation of GPR signal (interpretation summarized in caption of Fig. 8b), which might be linked to their high dip-angle, causing a minor amount of energy being reflected back to the antenna, but more likely, due to the presence of conductive fine soils across faulted zones (e.g. circles 1 and 2 in Fig. 8b). These conditions can be linked to different depositional facies across fault zones (McClymont et al. 2010) e.g. including colluvial wedges (Reiss et al. 2013; Bubeck et al. 2015). Such peculiar GPR signature is therefore compatible with possible co-seismic displacement due to Late Quaternary surface faulting events (Fig. 8b). Using such stratigraphic evidence and geophysical markers of faulting, we have therefore interpreted and classified synthetic (west-dipping, blue) and antithetic (east-dipping, red) normal faulting events within the Quaternary sediments (Fig. 8b). The interpreted faults present a dip angle between 65-75° and a vertical offset ranging from a few tens of centimeters up to ~1 meter, and were picked using solid lines (fault sticks). During the interpretation process, when the presence of geophysical markers of faulting were uncertain, a dashed fault segment has been initially added and only later analyzed a second time by looking at their possible connection with nearby lines. In addition to the fault sticks within the Quaternary sectors, we placed main fault sticks across the sharp boundary between the Triassic dolostone and the Quaternary sediments. The contact is generally characterized by fractured zones including hyperbolic diffractions (in unmigrated data), contorted reflections geometry of variable dip angle, abrupt truncations marked by sharp lateral variation of the reflectivity due to localized attenuation (Figs. 3 to 9).

By interpolation of the fault sticks placed in adjacent profiles, we have created the fault surfaces that show a good degree of continuity, from north to south (Fig. 9).

Our geophysical interpretation allowed reconstructing the fault-network and the geometry of the associated synsedimentary deposits, at a higher resolution (Fig. 9). The 3D map views of Fig. 9 show a structural scheme of the main fault lineaments displaying a NW-SE strike. Our interpretation highlights an en-echelon system of main SW and NE-dipping faults on both sides of the hills where the Triassic dolostones crop out, as well as several secondary structures within the Quaternary sediments.

## 5. Discussion

### 5.1 Inferences from subsurface 3D model

The high-angle GPR discontinuities identified in the study, dissecting not only Quaternary alluvial-colluvial deposits but also deeper reflections referred to deeper stratigraphic layers, show a considerable continuity in the NW-SE direction (Fig. 9). These structures can be interpreted as the surface expression of an articulated set of extensional meso-faults associated with the VCT.

The reconstructed faults are arranged in a horst-graben structure in which the higher displacements are associated to the west-dipping faults (Fig. 9). Among these faults, the master structure in the southern sector of the basin (Fig. 9a) bound toward west a structural high where the Triassic dolostones crop out. The structural high, which corresponds to a topographic high elongated in the NNW-SSE direction, is also bordered towards the east by a minor east-dipping normal fault (Fig. 9b). Thus, it appears as an uplifted horst showing an axis of elongation sub-parallel to the average strike of the Campotense basin. The horst is mostly buried within the basin but locally emerges from the Quaternary sediments, as in the central portion of the investigated area (*h1* and *h2* in Fig. 2a).

The fault-set d1 in Fig. 9c shows the maximum displacements and the most evident deformations of the adjacent subsurface deposits. It can be considered a splay of the VCT (Fig. 8b), separated by a right step-over of about 0.5 km from the main segment that borders the eastern basin (Figs. 2c, 8a).



The three-dimensional model (Fig. 9a,c) highlights that these faults, despite having an average NW-SE direction, are characterized by a complex polymodal pattern of strikes, with NS sections alternating to NW-SE sections. The character, which is observed at various scales, both along the entire VCT and along all the extensional structures of the area (Brozzetti et al. 2017a), is also confirmed by the statistical analysis of the reconstructed fault planes reported in the stereo plots of Fig. 9d (d1-d3= west-dipping faults; d2-d4= east-dipping faults).

FIGURE 9 HERE

The variations of thickness of the Quaternary deposits, detectable on the radar profiles, are consistent with the horst and graben configuration. Thinning is observed in correspondence with the raised buried blocks whereas thickening and wedge-shaped and locally chaotic geometries occur in correspondence with the lowered blocks. These latter features are only associated with west-dipping faults, thus enhancing the role of this fault set (Fig. 8b), and the syn-tectonic nature of the Late Quaternary sedimentation.

## 5.2 Seismic hazard implications

In many cases, seismological data show that the outcropping Quaternary faults are capable of releasing earthquakes, but the maximum expected magnitude is not well constrained. An estimate of can be made using well-known scale-relationships (Wells and Coppersmith 1994; Wesnousky et al. 2008, Leonard 2010, Stirling et al. 2013) with knowledge of the geometric parameters (e.g. fault length, area and depth), which are often difficult to assess. These scale relations can be applied also on scarps originated by cumulated coseismic surface faulting events of medium-strong earthquakes (generally  $M > 6$ ), possibly distinguishing the amount of slip due to each event through paleoseismological analysis. But in the case of VCT, no direct information is available on the nature of the surveyed deposits, and their accurate dating has not been carried out at the present day. The interpretation of our GPR data confirms the segmentation of the VCT and point out the presence of a buried splay, which appears to have exerted a strong control on the deposition of Late Quaternary sediments, just below the present topographic surface. Moreover, we have highlighted that the sediments, in turn, are affected by faulting. Their location at a very low depth (1 - 4 m) in a flat land of an intra-mountain basin which is presently undergoing alluvial and colluvial sedimentation, suggests their attribution to the Holocene. Thus, pointing out normal faulting of Holocene deposits would be, in itself, a very important result for the Campotenes area, as no previous study has provided this kind of evidence yet. In fact, a Middle-Late Pleistocene age of activity was suggested for the Mercure and Campotenes boundary faults by Schiattarella et al. (1994) and Brozzetti et al. (2017a), based on morpho-structural observations, whereas their Holocene activity had been only inferred according to the possible associations of the faults with the recent 2010-2014 Pollino seismic sequence (Brozzetti et al. 2017a).

Our data seem even more promising because the GPR facies interpretation highlights the possible presence of small-scale grabens or half-graben and fault-related coseismic-wedges (e.g. as observed by Reiss et al. 2013 and Bubeck et al. 2015), at shallow depth (just below the present agricultural soil). This inference would testify to not only the persistence of extensional deformations up to the very Late Quaternary but would even imply the occurrence of episodes of surface faulting, proving new perspectives on the actual seismic hazard of the area. In other words, the Campotenes basin may have been affected in the relatively recent past by medium-strong earthquakes, nucleated from the VCT, capable of producing surface coseismic scarps, which were subsequently erased by footwall erosion and sedimentation at the hanging wall.



501 The hypothesis of past earthquakes, with a magnitude sufficiently high to cause surface ruptures in this area, sounds  
 502 reasonable if we consider that historical events with  $6 < M_w < 7$  are documented a little further (~50 km) north and  
 503 south (Fig. 1a) (Guidoboni et al. 2018).  
 504 Some paleoseismological earthquakes with inferred magnitude up to  $M_w = 7$  are attributed to the Castrovallari fault,  
 505 located at about 20 km to SE and also falling within the Pollino seismic gap (Cinti et al. 1997; Michetti et al. 1997;  
 506 Cinti et al. 2002, 2015; and Ercoli et al. 2015).  
 507 The estimates of the VCT fault-length (Brozzetti et al. 2017a) provide an overall value of 15 km which is compatible  
 508 with the maximum expected magnitudes capable to produce surface breaks. From using earthquake scaling  
 509 relationships based on coseismic rupture-length, as the main computation parameter, the obtained magnitudes are in  
 510 the range of 6.45 (Wells and Coppersmith 1994) to 6.8 (Wesnousky et al. 2008; Leonard 2010) in the case of a  
 511 complete rupture of the VCT fault. The result suggests that the most recent earthquakes that have affected the study  
 512 area (2012 -  $M_w$  5.2; 1894 -  $M_w$  5.1; 1708 -  $M_w$  5.8 and perhaps 1693 -  $M_w$  5.6) have a source at ~ 8 km depth (Totaro  
 513 et al. 2015; Brozzetti et al. 2017a; Napolitano et al. 2020 and 2021, Sketsiou et al., 2021). Thus, the seismic energy  
 514 released is likely too low for an active fault set as well as not enough to be causative of the buried VCT ruptures  
 515 detected. Because historical catalogs do not show events with  $M_w > 6$  (Guidoboni et al. 2018), probably a very  
 516 energetic earthquake could have occurred before the period covered by the available seismological catalogs. In this  
 517 context, the area needs more investigations to verify if an event with  $M > 6$  can repeat in the near future, as suggested  
 518 by the recurrence times of strong earthquakes generated by the typical Apennine extensional faults, specifically ~ 4  
 519 ky for this region (Galli 2020). Our study, points out the need of extending our detailed reconstruction of the buried  
 520 segments of the VCT, both along- and across-strike, and not only in the surveyed sector, but also on segments  
 521 bounding the northern edge up to the Mercure basin. In addition, our results may also be useful and preparatory for  
 522 orienting and locating further campaigns, integrating other geophysical tools, and possibly paleoseismological trenches,  
 523 drilling and sampling for dating (e.g., luminescence, radiocarbons, etc).  
 524 Such investigations could help to address the following crucial points, namely: i) ground truthing the presence of such  
 525 past coseismic surface breaks along the VCT, ii) define their timing, iii) obtain a recurrence time for the most energetic  
 526 events, and ultimately iv) aid a quantitative evaluation of the probability that a strong earthquake could hit the area in  
 527 the near future.

## 528 6. Conclusions

529 Our workflow allowed for the creation of a detailed 3D model which reconstructs the near-surface pattern of  
 530 paleoseismic ruptures across an area straddling the VCT active fault across the Campotense continental basin (Mt.  
 531 Pollino region). Based on previous geological mapping, the VCT in southern section of the study area was  
 532 hypothesized to be buried under a clastic Holocene cover.  
 533 We have used non-destructive GPR survey, a powerful tool to investigate the shallow geological structures. The  
 534 processing, analysis, assemblage, and interpretation of the 49 GPR profiles was pursued using expertise, techniques,  
 535 and tools borrowed from reflection seismic industry applications. The use of GPR has allowed us to quickly investigate  
 536 the study area with low costs, in a non-destructive manner and without special authorizations. A relatively fast pseudo-  
 537 3D GPR survey operated during four days of team fieldwork was an efficient compromise between spatial coverage  
 538 of the study site and duration of the acquisition. On the other hands, the data processing was non-trivial, requiring  
 539 about six months overall to set up an optimized workflow, due to challenging characteristics like the steep and rugged



topography as well as sharp lateral variations of geophysical properties of media (Triassic Dolostones vs Quaternary deposits). More in detail of the study area, our structural reconstruction shows several sets of sub-vertical discontinuities (1-4 m depth range), which we interpreted as extensional surface faulting, bounding small local “graben or semi-graben-like” structures located within Holocene sediments and down to underlying dolostones. We have also identified some chaotic and laterally discontinuous GPR-stratigraphic facies, interpreted as near-fault deposits (i.e. colluvial wedges?). These structures suggest the possibility that surface faulting occurred in relatively recent times, but its traces were successively leveled by the concurrent natural processes of erosion, aggradation and, anthropogenic activities. All these buried features suggests that past strong earthquakes ( $6 < M_w < 7$ ) might have occurred in the study area, which is located within the central sector of the well known “Mt. Pollino seismic gap”. As in the time range covered by the historical seismological catalogs there is no record of such energetic events, we hypothesize that the area could be at high risk of occurrence of a strong earthquake. We hope the primary effect of our work is to raise the level of attention regarding the seismic hazard in the Campotenes area, thus prompting further research to achieve an improvement of the base-knowledge for assessing its seismogenic potential. We firmly promote a more widespread use of our GPR workflow, particularly where near-surface data are scarce, as a base study for other seismic gaps worldwide.

## Acknowledgments

The study has benefited from funding sources: Agreement INGV-DPC 2012-2013 & 2014-2015, Project S1 – Miglioramento delle conoscenze per la definizione del potenziale sismogenetico - Base-knowledge improvement for assessing the seismogenic potential of Italy, <https://sites.google.com/site/ingvdpcprojects1/home>, resp. Cristina Pauselli, funded by Italian Presidenza del Consiglio dei Ministri – Dipartimento della Protezione Civile (DPC). The paper does not necessarily represent DPC official opinion and policy. We sincerely thank Leonardo Speziali, Prof. Costanzo Federico, and Roberto Volpe for their support during the field operations, as well as Khayal Gavarof for his valuable collaboration in data processing. We thank QGIS (<https://www.qgis.org/it/site/>) for providing the software with an open-source license, Petroleum Experts (<https://www.petex.com/products/move-suite/>), and dGB (<https://www.dgbes.com/>) for providing the academic licenses MOVE and OpenDtect software. We acknowledge NETGEO for academic access to the NRTK network (<http://www.netgeo.it/>). We would also like to thank the Ministero dell’Ambiente e della Tutela del Territorio e del Mare (MATM) and the Regione Calabria for providing free access to geospatial data such as DTM and aerials (Regione Calabria - [www.regione.calabria.it](http://www.regione.calabria.it), under license IODL 2.0. - <https://www.dati.gov.it/iodl/2.0/>). The paper is the results of collaboration within the framework of the Interuniversity Center for 3D Seismotectonics with territorial applications - CRUST (<https://www.crust.unich.it/>). The GPR dataset presented in this study is available on request from the corresponding author.





## 572 **References**

- 573 Amicucci, L., Barchi, M.R., Montone, P., and Rubilani, N.: The Vallo di Diano and Auletta extensional basins in the  
 574 southern Apennines (Italy): a simple model for a complex setting, *Terra Nova*, 20, 475-482,  
 575 <https://doi.org/10.1111/j.1365-3121.2008.00841.x>, 2008.
- 576 Amodio Morelli, L., Bonardi, G., Colonna, V., Dietrich, D., Giunta, G., Ippolito, F., Liguori, V., Lorenzoni, S.,  
 577 Paglionico, A., Perrone, V., Piccarreta, G., Russo, M., Scandone, P., Zanettin-Lorenzoni, E., and Zuppetta, A.: L'Arco  
 578 calabro peloritano nell'orogene appenninico-maghrebide, *Mem. Soc. Geol. It.*, 17, 1-60, 1976.
- 579 Anchuela, Ó.P., Lafuente, P., Arlegui, L., Liesa, C. L., and Simon, J. L.: Geophysical characterization of buried active  
 580 faults: the Concud Fault (Iberian Chain, NE Spain), *Int J Earth Sci (Geol Rundsch)*, 105, 2221–2239,  
 581 <https://doi.org/10.1007/s00531-015-1283-y>, 2016.
- 582 Annan, A.P.: Ground-penetrating radar workshop notes, Sensors and Software Inc. Mississauga, ON, Canada, 192  
 583 pp., 2001.
- 584 Ascione, A., Cinque, A., Santangelo, N., and Tozzi, M.: Il Bacino del Vallo di Diano e la tettonica trascorrente plio-  
 585 quaternaria: nuovi vincoli cronologici e cinematici, *Stud. Geol. Camerti*, 1992/1, 201–208, 1992a.
- 586 Audru, J.C., Bano, M., Begg, J., Berryman, K., Henrys, S., and Niviere, B.: GPR investigations on active faults in  
 587 urban areas: the Georisc-NZ project in Wellington, New Zealand, *Comptes Rendus de l'Academie des Sciences -*  
 588 *Series IIA, Earth planet. Sci.*, 333(8), 447-454, [https://doi.org/10.1016/S1251-8050\(01\)01663-9](https://doi.org/10.1016/S1251-8050(01)01663-9), 2001.
- 589 Bano, M., Edel, J.-B., Herquel G., and EPGs class 2001/2002: Geophysical investigation of a recent shallow fault,  
 590 *The Leading Edge*, 21 (7), 648-650, <https://doi.org/10.1190/1.1497317>, 2002.
- 591 Barchi, M.R., Lavecchia, G., Galadini, F., Messina P., Michetti, A. M., Peruzza, L., Pizzi, A., Tondi, E., and Vittori,  
 592 E.: Sintesi delle conoscenze sulle faglie attive in Italia Centrale: parametrizzazione ai fini della caratterizzazione della  
 593 pericolosità sismica, CNR-GNDT, Projects 5.1.2, 6a2, 5.1.1, Esagrafica, Roma, 2000.
- 594 Bello S., de Nardis R., Scarpa R., Brozzetti F., Cirillo D., Ferrarini F., di Lieto B., Arrowsmith R. J., Lavecchia G.:  
 595 Fault Pattern and Seismotectonic Style of the Campania – Lucania 1980 Earthquake (Mw 6.9, Southern Italy): New  
 596 Multidisciplinary Constraints”, *Frontiers in Earth Science*, 8, 652, <https://doi.org/10.3389/feart.2020.608063>, 2021.
- 597 Benson, A.K.: Applications of ground penetrating radar in assessing some geological hazards: examples of  
 598 groundwater contamination, faults, cavities, *Journal of Applied Geophysics*, 33(1–3), 177–193,  
 599 [https://doi.org/10.1016/0926-9851\(95\)90040-3](https://doi.org/10.1016/0926-9851(95)90040-3), 1995.
- 600 Beres, M., Huggenberger, P., Green, A. G., and Horstmeyer, H.: Using two- and three-dimensional georadar methods  
 601 to characterize glaciofluvial architecture, *Sediment. Geol.*, 129, 1-24, 1999.
- 602 Boncio, P., Pizzi, A., Brozzetti, F., Pomposo, G., Lavecchia, G., Di Naccio, D., and Ferrarini, F., Coseismic ground  
 603 deformation of the 6 april 2009 L'Aquila earthquake (central Italy, Mw 6.3), *Geoph. Res. Lett.*, 37,  
 604 <http://dx.doi.org/10.1029/2010GL042807>, 2010.
- 605 Brandes, C., Igel, J., Loewer, M., Tanner, D., C., Lang, J., Müller, K., and Winsemann, J.: Visualisation and analysis  
 606 of shear-deformation bands in unconsolidated Pleistocene sand using ground-penetrating radar: Implications for  
 607 paleoseismological studies, *Sedimentary Geology*, 367, 135-145, <https://doi.org/10.1016/j.sedgeo.2018.02.005>, 2018.
- 608 Bricheva, S.S., Dubrovin, I.O., Lunina, O.V., Denisenko, I.A., Matasov, V.M., Turova, I.V., Entin, A.L., Panin, A.V.,  
 609 and Deev, E.V.: Numerical simulation of ground-penetrating radar data for studying the geometry of fault zone, *Near*  
 610 *Surface Geophysics*, Accepted Author Manuscript, <https://doi.org/10.1002/nsg.12153>, 2021.



- 611 Bristow, C.S., and Jol, H.M.: GPR in sediments: advice on data collection, basic processing and interpretation, a good  
 612 practice guide, In: Ground Penetrating Radar in Sediments, (Eds C.S. Bristow and H.M. Jol) Geol. Soc. Spec. Publ.,  
 613 211, 1-7, <https://doi.org/10.1144/GSL.SP.2001.211.01.02>, 2003.
- 614 Brozzetti, F., and Lavecchia, G.: Seismicity and related extensional stress field: the case of the Norcia Seismic Zone  
 615 (Central Italy), *Ann. Tectonicae*, 8(1), 36–57, 1994.
- 616 Brozzetti, F., Lavecchia, G., Mancini, G., Milana G., and Cardinali, M.: Analysis of the 9 September 1998 Mw 5.6  
 617 Mercure earthquake sequence (southern Apennines, Italy): a multidisciplinary approach, *Tectonophysics*, 476, 210–  
 618 225, <https://doi.org/10.1016/j.tecto.2008.12.007>, 2009.
- 619 Brozzetti, F.: The Campania-Lucania extensional fault system (southern Italy): a suggestion for a uniform model of  
 620 active extension in the Italian Apennines, *Tectonics*, 30 (5), 1-26, TC5009, <http://dx.doi.org/10.1029/2010TC002794>,  
 621 2011.
- 622 Brozzetti, F., Cirillo, D., de Nardis, R., Lavecchia, G., and Cardinali, M.: Detailed mapping of active faults in the  
 623 Calabro-Lucania Region, Report INGV-DPC 2014-2015 project S1 "Base-knowledge improvement for assessing the  
 624 seismogenic potential of Italy, <https://sites.google.com/site/ingvdpcprojects1/home>, 2015.
- 625 Brozzetti, F., Cirillo, D., de Nardis, R., Cardinali, M., Lavecchia, G., Orecchio, B., Presti D., and Totaro, C.: Newly  
 626 identified active faults in the Pollino seismic gap, southern Italy, and their seismotectonic significance, *J. Struct. Geol.*,  
 627 94, 13-31, <https://doi.org/10.1016/j.jsg.2016.10.005>, 2017a.
- 628 Brozzetti, F., Cirillo, D., Liberi, F., Piluso, E., Faraca, E., De Nardis, R., and Lavecchia, G.: Structural style of  
 629 Quaternary extension in the Crati Valley (Calabrian Arc): Evidence in support of an east-dipping detachment fault, *It.*  
 630 *Journ. of Geosci.*, 136(3), 434-453, <https://doi.org/10.3301/IJG.2017.11>, 2017b.
- 631 Brozzetti, F., Boncio, P., Cirillo, D., Ferrarini, F., de Nardis, R., Testa, A., Liberi, F., and Lavecchia, G.: High  
 632 resolution field mapping and analysis of the August–October 2016 coseismic surface faulting (Central Italy  
 633 Earthquakes): slip distribution, parameterization and comparison with global earthquakes, *Tectonics*, 38, 417–439,  
 634 <https://doi.org/10.1029/2018TC005305>, 2019.
- 635 Brozzetti, F., Mondini, A.C., Pauselli, C., Mancinelli, P., Cirillo, D., Guzzetti, F., and Lavecchia, G.: Mainshock  
 636 anticipated by intra-sequence ground deformations: Insights from multiscale field and SAR interferometric  
 637 measurements, *Geosciences (Switzerland)*, 10(5), 186, <https://doi.org/10.3390/geosciences10050186>, 2020.
- 638 Bubeck, A., Wilkinson, M., Roberts, G.P., Cowie, P. A., McCaffrey, K.J.W., Phillips, R., and Sammonds, P.: The  
 639 tectonic geomorphology of bedrock scarps on active normal faults in the Italian Apennines mapped using combined  
 640 ground penetrating radar and terrestrial laser scanning, *Geomorphology*, 237, 38-51,  
 641 <https://doi.org/10.1016/j.geomorph.2014.03.011>, 2015.
- 642 Busby, J.P., and Merritt, J.W.: Quaternary deformation mapping with ground penetrating radar, *J. appl. Geophys.*,  
 643 41(1), 75–91, [https://doi.org/10.1016/S0926-9851\(98\)00050-0](https://doi.org/10.1016/S0926-9851(98)00050-0), 1999.
- 644 Cai, J., McMechan, G.A., and Fisher, M.A.: Application of ground penetrating radar to investigation of near-surface  
 645 fault properties in the San Francisco Bay region, *Bull. seism. Soc. Am.*, 86(5), 1459-1470, Available online: (accessed  
 646 09 feb 2021), <https://citeseerx.ist.psu.edu/viewdoc/download?doi=10.1.1.944.4417&rep=rep1&type=pdf>, 1996.
- 647 Calamita, F., Pizzi, A., and Roscioni, M.: I fasci di faglie recenti ed attive di M. Vettore - M. Bove e di M. Castello -  
 648 M. Cardosa (Appennino Umbro-Marchigiano), In *Studi Geologici Camerti*; Università di Camerino: Camerino, Italy,  
 649 1992; 81-95, Available online: <http://193.204.8.201:8080/jspui/handle/1336/552> (accessed on 09 Feb 2021), 1992.
- 650 Carpentier, S.F.A., Green, A.G., Langridge, R., Boschetti, S., Doetsch, J., Abacherli, A.N., Horstmeyer, H., and  
 651 Finnemore, M.: Flower structures and Riedel shears at a step over zone along the Alpine Fault (New Zealand) inferred



652 from 2-D and 3-D GPR images, *Journal Geophysical Research*, 117(B2), B02406,  
 653 <https://doi.org/10.1029/2011JB008749>, 2012a.

654 Carpentier, S.F.A., Green, A.G., Doetsch, J., Dorn, C., Kaiser, A.E., Campbell, F., Horstmeyer, H., and Finnemore,  
 655 M.: Recent deformation of Quaternary sediments as inferred from GPR images and shallow P-wave velocity  
 656 tomograms: Northwest Canterbury Plains, New Zealand, *J. Appl. Geophys.*, 8, 2-15,  
 657 <https://doi.org/10.1016/j.jappgeo.2011.09.007>, 2012b.

658 Cello, G., Deiana, G., Ferelli, L., Marchegiani, L., Maschio, L., Mazzoli, S., Michetti, A., Serva, L., Tondi, E., and  
 659 Vittori, T.: Geological constraints for earthquake faulting studies in the Colfiorito area (Central Italy), *J. Seismol.*, 4,  
 660 357-364, <https://doi.org/10.1023/A:1026525302837>, 2000.

661 Cello G., E. Tondi, L. Micarelli, and L. Mattioni: Active tectonics and earthquake sources in the epicentral area of the  
 662 1857 Basilicata earthquake (southern Italy), *Journal of Geodynamics*, 36, 1-2, 37-50, [https://doi.org/10.1016/S0264-](https://doi.org/10.1016/S0264-3707(03)00037-1)  
 663 [3707\(03\)00037-1](https://doi.org/10.1016/S0264-3707(03)00037-1), 2003.

664 Chiaraluce, L., Di Stefano, R., Tinti, E., Scognamiglio, L., Michele, M., Casarotti, E., Cattaneo, M., De Gori, P.,  
 665 Chiarabba, C., Monachesi, G., Lombardi, A., Valoroso, L., Latorre, D., and Marzorati, S.: The 2016 Central Italy  
 666 Seismic Sequence: A First Look at the Mainshocks, Aftershocks, and Source Models, *Seismological Research Letters*,  
 667 88(3), 757-771, <https://doi.org/10.1785/0220160221>, 2017.

668 Christie, M., Tsoflias, G.P., Stockli, D.F., and Black, R.: Assessing fault displacement and off-fault deformation in an  
 669 extensional tectonic setting using 3-D ground-penetrating radar imaging, *J. appl. Geophys.*, 68(1), 9-16,  
 670 <https://doi.org/10.1016/j.jappgeo.2008.10.013>, 2009.

671 Cinti, F. R., Cucci, L., Pantosti, D., D'Addezio, G., and Meghraoui, M.: A major seismogenic fault in a 'silent area':  
 672 the Castrovillari fault (southern Apennines, Italy), *Geophysical Journal International*, 130(3), 595-605, Available  
 673 online: (accessed 09 Feb 2021), <https://www.earth-prints.org/bitstream/2122/12031/1/text.pdf>, 1997.

674 Cinti, F. R., Moro, M., Pantosti, D., Cucci, L., and D'Addezio, G.: New constraints on the seismic history of the  
 675 Castrovillari fault in the Pollino gap (Calabria, southern Italy), *J. Seismol.*, 6, 199-217,  
 676 <https://doi.org/10.1023/A:1015693127008>, 2002.

677 Cinti, F.R., Pauselli, C., Livio, F., Ercoli, M., Brunori, C.A., Ferrario, F., Volpe, R., Civico, R., Pantosti, D., Pinzi, S.,  
 678 De Martini, P.M., Ventura, G., Alfonsi, L., Gambillara, R., and Michetti, A.M.: Integrating multidisciplinary, multi-  
 679 scale geological and geophysical data to image the Castrovillari fault (Northern Calabria, Italy), *Geophys. J. Int.*, 203,  
 680 1847-1863, <https://doi.org/10.1093/gji/ggv404>, 2015.

681 ~~Cirillo, D.: Digital Field Mapping and Drone-Aided Survey for Structural Geological Data Collection and Seismic~~  
 682 ~~Hazard Assessment: Case of the 2016 Central Italy Earthquakes, *Applied Sciences*, 10,~~  
 683 ~~5233, <https://doi.org/10.3390/app10155233>, 2020.~~

684 ~~Cirillo, D., Totaro, C., Lavecchia, G., Orecchio, B., de Nardis, R., Presti, D., Ferrarini, F., Bello, S., and Brozzetti, F.:~~  
 685 ~~Structural complexities and tectonic barriers controlling recent seismic activity of the Pollino area (Calabria-Lucania,~~  
 686 ~~Southern Italy))—constraints from stress inversion and 3D fault model building, submitted to this special issue, *Solid*~~  
 687 ~~Earth~~, 2021.

688 ~~Civico, R., Pucci, S., Villani, F., Pizzimenti, L., De Martini, P. M., Nappi, R., and the Open-EMERGEIO Working~~  
 689 ~~Group: Surface ruptures following the 30 October 2016 Mw 6.5 Norcia earthquake, central Italy, *J. Maps*, 14, 151-~~  
 690 ~~160, <https://doi.org/10.1080/17445647.2018.1441756>, 2018.~~



- 691 Conyers, L.B.: Ground-penetrating Radar for Archaeological Mapping. In: Wiseman J., El-Baz F. (eds) Remote  
 692 Sensing in Archaeology, Interdisciplinary Contributions To Archaeology, Springer, New York, NY.  
 693 [https://doi.org/10.1007/0-387-44455-6\\_13](https://doi.org/10.1007/0-387-44455-6_13), 2006.
- 694 Conyers, L.B.: Ground-penetrating Radar for Geoarchaeology, Wiley-Blackwell, London, Wiley Online Library, 160  
 695 pp., doi:10.1002/9781118949993, 2016.
- 696 Daniels, D. J., Ground Penetrating Radar. Radar, Sonar and amp; Navigation, Institution of Engineering and  
 697 Technology, London: IEE Press, 752 pp, <https://doi.org/10.1002/0471654507.emel52>, 2004.
- 698 Davis, J.L., and Annan, A.P.: Ground penetrating radar for high resolution mapping of soil and rock stratigraphy,  
 699 Geophys. Prospect., 37, 531-551, 1989.
- 700 Demanet, F., Renardy, D., Vanneste, K., Jongmans, D., Camelbeeck, T., and Meghraoui, M.: The use of geophysical  
 701 prospecting for imaging active faults in the Roer Graben, Belgium, Geophysics, 66(1), 78-89,  
 702 <https://doi.org/10.1190/1.1444925>, 2001.
- 703 Dujardin, J. R., and Bano, M.: Topographic migration of GPR data: Examples from Chad and Mongolia, Comptes  
 704 Rendus Geoscience, 345, 2, 73-80, <https://doi.org/10.1016/j.crte.2013.01.003>, 2013.
- 705 Ercoli, M., Pauselli, C., Frigeri, A., Forte, E., and Federico, C.: “Geophysical paleoseismology” through high  
 706 resolution GPR data: A case of shallow faulting imaging in Central Italy, Journal of Applied Geophysics, 90, 27-40,  
 707 <https://doi.org/10.1016/j.jappgeo.2012.12.001>, 2013a.
- 708 Ercoli, M., Pauselli, C., Forte, E., Frigeri, A., and Federico, C.: The Mt. Pollino Fault (southern Apennines, Italy):  
 709 GPR signature of Holocene earthquakes in “silent” area, in: 7th Int. Work. Adv. Gr. Penetrating Radar, IEEE, 1-6,  
 710 <https://doi.org/10.1109/IWAGPR.2013.6601510>, 2013b.
- 711 Ercoli, M., Pauselli, C., Frigeri, A., Forte, E., and Federico, C.: 3-D GPR data analysis for high-resolution imaging of  
 712 shallow subsurface faults: The Mt Vettore case study (Central Apennines, Italy), Geoph. J. Int., 198(1), 609-621,  
 713 <https://doi.org/10.1093/gji/ggu156>, 2014.
- 714 Ercoli, M., Pauselli, C., Cinti, F.R., Forte, E., and Volpe, R.: Imaging of an active fault: Comparison between 3D GPR  
 715 data and outcrops at the Castrovillari fault, Calabria, Italy, Interpretation, 3(3), SY57-SY66,  
 716 <https://doi.org/10.1190/INT-2014-0234.1>, 2015.
- 717 Ercoli, M., Di Matteo, L., Pauselli, C., Mancinelli, P., Frapiccini, S., Talegalli, L., and Cannata, A.: Integrated GPR  
 718 and laboratory water content measures of sandy soils: From laboratory to field scale, Construction and Building  
 719 Materials, 159, 734-744, <https://doi.org/10.1016/j.conbuildmat.2017.11.082>, 2018.
- 720 Ercoli, M., Forte, E., Porreca, M., Carbonell, R., Pauselli, C., Minelli, G., and Barchi, M. R.: Using seismic attributes  
 721 in seismotectonic research: an application to the Norcia Mw = 6.5 earthquake (30 October 2016) in central Italy, Solid  
 722 Earth, 11, 329-348, <https://doi.org/10.5194/se-11-329-2020>, 2020.
- 723 Filice, F., Liberi, F., Cirillo, D., Pandolfi, L., Marroni, M., and Piluso E.: Geology map of the central area of Catena  
 724 Costiera: insights into the tectono-metamorphic evolution of the Alpine belt in Northern Calabria, Journal of Maps,  
 725 11(1), 114-125, <https://doi.org/10.1080/17445647.2014.944877>, 2015.
- 726 Filice, F., and Seeber, L.: The Culmination of an Oblique Time-Transgressive Arc Continent Collision: The Pollino  
 727 Massif Between Calabria and the Southern Apennines, Italy, Tectonics, 38(1), 3261-3280,  
 728 <https://doi.org/10.1029/2017TC004932>, 2019.
- 729 Forte, E., and Pipan, M.: Review of multi-offset GPR applications: Data acquisition, processing and analysis, Signal  
 730 Processing, 132, 210-220, <https://doi.org/10.1016/j.sigpro.2016.04.011>, 2017.



- 731 Frigeri, A., and Ercoli, M.: The ScanMars Subsurface Radar Sounding Experiment on AMADEE-18, *Astrobiology*,  
 732 20(11), 1338-1352, <https://doi.org/10.1089/ast.2019.2037>, 2020.
- 733 Gafarov, K., Ercoli, M., Cirillo, D., Pauselli, C., and Brozzetti, F.: Extending surface geology data through GPR  
 734 prospecting: Quaternary faulting signature from the Campotenese area (Calabria-Italy), 2018 17th International  
 735 Conference on Ground Penetrating Radar (GPR), Rapperswil, pp. 1-4, doi: 10.1109/ICGPR.2018.8441611, 2018.
- 736 Galadini, F., and Galli, P.: Paleoseismology of silent faults in the Central Apennines (Italy): the Mt. Vettore and Laga  
 737 Mts. Faults, *Annals of Geophysics*, 46(5), 815-836, <https://doi.org/10.4401/ag-3457>, 2003.
- 738 Galli, P., and Bosi, V.: Catastrophic 1638 earthquakes in Calabria (southern Italy): New insights from  
 739 paleoseismological investigation. *J. Geophys. Res.*, 108, B12004, <https://doi.org/10.1029/2001JB001713>, 2003.
- 740 Galli, P., Galadini, F., and Pantosti, D.: Twenty years of paleoseismology in Italy, *Earth-Science Reviews*, 88(1-2),  
 741 89-117, <https://doi.org/10.1016/j.earscirev.2008.01.001>, 2008.
- 742 Galli, P., Galderisi, A., Peronace, E., Giaccio, B., Hajdas, I., Messina, P., Pileggi, D., and Polpetta, F.: The awakening  
 743 of the dormant Mount Vettore fault (2016 central Italy earthquake, Mw 6.6): Paleoseismic clues on its millennial  
 744 silences, *Tectonics*, 38, 687-705, <https://doi.org/10.1029/2018TC005326>, 2019.
- 745 Galli, P.: Recurrence times of central-southern Apennine faults (Italy): Hints from paleoseismology, *Terra Nova*, 32,  
 746 399-407, <https://doi.org/10.1111/ter.12470>, 2020.
- 747 Geoportale Nazionale – Lidar data 1 m resolution, Ministero dell’Ambiente e della Tutela del Territorio e del Mare –  
 748 Creative Commons License (Cc BY-SA 3.0 IT), last access February 2018.
- 749 Ghisetti, F., and Vezzani, L.: Structural Map of Mt. Pollino (Southern Italy), 1:50.000 Scale, SELCA, Firenze, 1983.
- 750 Goodman, D., Hongo, H., Higashi, N., Inaoka, H., and Nishimura, Y.: GPR surveying over burial mounds: correcting  
 751 for topography and the tilt of the GPR antenna, *Near Surface Geophysics*, 5, 383-388, [https://doi.org/10.3997/1873-](https://doi.org/10.3997/1873-0604.2007020)  
 752 0604.2007020, 2007.
- 753 Goodman, D., and Piro S.: *GPR Remote Sensing in Archaeology* Springer Science & Business Media (ISBN: 978-3-  
 754 642-31856-6), doi: 10.1007/978-3-642-31857-3, 2013.
- 755 Grandjaquet, C.L., and Grandjaquet, M.J.: *Geologie de la zone de Diamante-Verbicaro (Calabre)*, *Geol. Romana* 1,  
 756 297-312, Available online: (accessed 09 Feb 2021), <http://www.dst.uniroma1.it/Volumel>, 1962.
- 757 Grasmueck, M.: 3-D ground-penetrating radar applied to fracture imaging in gneiss, *Geophysics*, 61(4), 1050-1064,  
 758 <https://doi.org/10.1190/1.1444026>, 1996.
- 759 Grasmueck, M., Weger, R., and Horstmeyer, H.: Full-resolution 3D GPR imaging, *Geophysics*, 70(1), K12-K19,  
 760 2005.
- 761 Green, A.G., Gross, R., Holliger, K., Horstmeyer, H., and Baldwin, J.: Results of 3-D georadar surveying and  
 762 trenching the San Andreas fault near its northern landward limit, *Tectonophysics*, 368, 7-23,  
 763 [https://doi.org/10.1016/S0040-1951\(03\)00147-1](https://doi.org/10.1016/S0040-1951(03)00147-1), 2003.
- 764 Gross, R., Holliger, K., Green, A.G., and John, B.: 3-D ground penetrating radar applied to paleoseismology: examples  
 765 from the Wellington Fault, New Zealand, in *Proceedings of the Eighth International Conference on Ground*  
 766 *Penetrating Radar*, 4084, 478-481, eds Noon, D.A., Stickley, G.F. & Longsta, D., Zurich, Switzerland, SPIE,  
 767 <https://doi.org/10.1117/12.383615>, 2000.
- 768 Gross, R., Green, A.G., Holliger, K., Horstmeyer, H., and Baldwin, J.: Shallow geometry and displacements on the  
 769 San Andreas Fault near Point Arena based on trenching and 3-D georadar surveying, *Geophysical Research Letters*,  
 770 29(20), 34-1-34-4, <https://doi.org/10.1029/2002GL015534>, 2002.



- 771 Gross, R., Green, A.G., Horstmeyer, H., Holliger, K., and Baldwin, J.: 3-D georadar images of an active fault: efficient  
 772 data acquisition, processing and interpretation strategies, *Subsurf. Sens. Technol. Appl.*, 4(1), 19-40,  
 773 <https://doi.org/10.1023/A:1023059329899>, 2003.
- 774 Gross, R., Green, A.G., Horstmeyer, H., and Begg, J.H.: Location and geometry of the Wellington Fault (New  
 775 Zealand) defined by detailed three-dimensional georadar data, *J. geophys. Res.*, 109, B05401,  
 776 <https://doi.org/10.1029/2003JB002615>, 2004.
- 777 Guidoboni E., Ferrari G., Mariotti D., Comastri A., Tarabusi G., Sgattori G., and Valentini G.: CFTISMed, Catalogo  
 778 dei Forti Terremoti in Italia (461 a.C.-1997) e nell'area Mediterranea (760 a.C.-1500), Istituto Nazionale di Geofisica  
 779 e Vulcanologia (INGV), doi: <https://doi.org/10.6092/ingv.it-cfti5>, 2018.
- 780 Heincke, B., Green, A.G., van der Kruk, J., and Willenberg, H.: Semblance-based topographic migration (SBTM): A  
 781 method for identifying fracture zones in 3D georadar data, *Near Surface Geophysics*, 4(2), 79-88,  
 782 <https://doi.org/10.3997/1873-0604.2005034>, 2006.
- 783 Horstmeyer, H., Corboz, P., Tronicke, J., Nobes, D.C., Campbell, B.A., and Green, A.G.: High-resolution geophysical  
 784 surveying at the Springfield Fault, New Zealand, in *Proceedings of the 11th European Meeting of Environmental and*  
 785 *Engineering Geophysics, Near Surface 2005*, Palermo, Italy, 5-8 Sep. 2005, 4 pp., [https://doi.org/10.3997/2214-4609-](https://doi.org/10.3997/2214-4609-pdb.13.P045)  
 786 [pdb.13.P045](https://doi.org/10.3997/2214-4609-pdb.13.P045), 2005.
- 787 Huguenberger, P.: Radar facies: recognition of facies patterns and heterogeneities within Pleistocene Rhine gravels,  
 788 NE Switzerland, In *Braided Rivers*, edited by J.L. Best and C.S. Bristow, *Geol. Soc. London Spec. Publ.*, 75, 163-  
 789 176, 1993.
- 790 Istituto Nazionale di Geofisica e Vulcanologia - INGV (2020 February, last access), <https://data.ingv.it/en/>.
- 791 Iannace, A., D'Errico, M., and Vitale, S.: Carta Geologica dell'area compresa tra Maratea, Castrovillari e Sangineto,  
 792 In: Vitale, S., Iannace, A. (Eds.), *Analisi Dello Strain Finito in 3D Dell'Unità Pollino-Ciagola (Confine Calabro-*  
 793 *lucano, Italia Meridionale)*, Studi Geologici Camerti, Nuova Serie, 2, 153-167 (ISSN: 0392-0631), 2004.
- 794 Iannace, A., Garcia Tortosa, F.J., and Vitale, S.: The Triassic metasedimentary successions across the boundary  
 795 between Southern Apennines and Calabria-Peloritani Arc (Northern Calabria, Italy), *Geol. J.*, 40, 155-171,  
 796 <https://doi.org/10.1002/gj.1001>, 2005.
- 797 Iannace, A., Vitale, S., D'Errico, M., Mazzoli, S., Di Staso, A., Macaione, E., Messina, A., Reddy, S.M., Somma, R.,  
 798 Zamparelli, V., Zattin, M., and Bonardi, G.: The carbonate tectonic units of northern Calabria (Italy): a record of  
 799 Apulian palaeomargin evolution and Miocene convergence, continental crust subduction, and exhumation of HP-LT  
 800 rocks, *J. Geol. Soc. Lond.*, 164, 1165-1186, <https://doi.org/10.1144/0016-76492007-017>, 2007.
- 801 Imposa, S., De Guidi, G., Grassi, S., Scudero, S., Barreca, G., Patti, G., and Boso, D.: Applying geophysical techniques  
 802 to investigate a segment of a creeping fault in the urban area of San Gregorio di Catania, southern flank of Mt. Etna  
 803 (Sicily - Italy), *Journal of Applied Geophysics*, 123, 153-163, <https://doi.org/10.1016/j.jappgeo.2015.10.008>, 2015.
- 804 ISIDe Working Group, Italian Seismological Instrumental and Parametric Database (ISIDe), Istituto Nazionale di  
 805 Geofisica e Vulcanologia (INGV), <https://doi.org/10.13127/ISIDE>, 2007.
- 806 Jewell, C.J., and Bristow, C.S.: GPR studies in the Piano di Pezza area of the Ovindoli-Pezza Fault, Central Apennines,  
 807 Italy: Extending palaeoseismic trench investigations with high resolution GPR profiling, *Near Surface Geophysics*,  
 808 4(3), 147-153, <https://doi.org/10.3997/1873-0604.2005040>, 2006.
- 809 Jol, H.M.: *Ground Penetrating Radar: Theory and Applications*, Elsevier, pp 544, ISBN: 9780444533487, 2009.
- 810 Kagan, Y.Y., and Jackson, D.D.: Seismic Gap Hypothesis: Ten years after, *J. Geophys. Res.*, 96(B13), 21419-21431,  
 811 <https://doi.org/10.1029/91JB02210>, 1991.



- 812 Lehmann, F., and Green, A.G.: Topographic migration of georadar data: Implications for acquisition and processing,  
 813 Geophysics, 65(3), 836-848, <https://doi.org/10.1190/1.1444781>, 2000.
- 814 Leonard, M.: Earthquake fault scaling: Relating rupture length, width, average displacement, and moment release,  
 815 Bull. Seismol. Soc. Am., 100(5A), 1971-1988, <https://doi.org/10.1785/0120090189>, 2010.
- 816 Liberi, F., Morten, L., and Piluso, E.: Geodynamic significance of the ophiolites within the Calabrian Arc. Island Arc,  
 817 15, 26-43, <https://doi.org/10.1111/j.1440-1738.2006.00520.x>, 2006.
- 818 Liberty, L.M., Hemphill-Haley, M.A., and Madin, I.P.: The Portland Hills Fault: uncovering a hidden fault in Portland,  
 819 Oregon using high resolution geophysical methods, Tectonophysics, 368(1-4), 89-103, [https://doi.org/10.1016/S0040-1951\(03\)00152-5](https://doi.org/10.1016/S0040-1951(03)00152-5), 2003.
- 820  
 821 Liner, C.L., and Liner, J.L.: Application of GPR to a site investigation involving shallow faults, The Leading Edge,  
 822 16(11), 1649-1651, <https://doi.org/10.1190/1.1437545>, 1997.
- 823 Malik, J.N., Sahoo, A.K., and Shah, A.A.: Ground-penetrating radar investigation along Pinjore Garden Fault:  
 824 implication toward identification of shallow subsurface deformation along active fault, NW Himalaya, Curr. Sci.,  
 825 93(10), 1422-1427, 2007.
- 826 Malik, J. N., Kumar, A., Satuluri, S., Puhan, B., and Mohanty, A.: Ground-Penetrating Radar Investigations along  
 827 Hajipur Fault: Himalayan Frontal Thrust-Attempt to Identify Near Subsurface Displacement, NW Himalaya, India",  
 828 International Journal of Geophysics, Article ID 608269, 7 pp., <https://doi.org/10.1155/2012/608269>, 2012.
- 829 Maschio, L., Ferranti, L., and Burrato, P.: Active extension in Val d'Agri area, southern Apennines, Italy: Implications  
 830 for the geometry of the seismogenic belt, Geophys. J. Int., 162, 591-609, <https://doi.org/10.1111/j.1365-246X.2005.02597.x>, 2005.
- 831  
 832 Matoš, B., Zajc, M., Kordić, B., Tomljenović, B., and Gosar, A.: Quaternary fault activity in the SW Pannonian Basin:  
 833 GPR surveying in the Bilogora Mt. (NE Croatia), Geological Quarterly, 61(1), 18-36, doi:  
 834 <https://doi.org/10.7306/gq.1308>, 2017.
- 835 McCalpin, J.P.: Paleoseismology, 2nd Edition, International Geophysics Series, 95, Elsevier Publishing, 647 pp., plus  
 836 additional website content at: [www.elsevier.com](http://www.elsevier.com), ISBN 978-0-12-373576-8, 2009.
- 837 McCann, W.R., Nishenko, S.P., Sykes, I.R., and Krause, J.: Seismic gaps and plate tectonics: seismic potential for  
 838 major boundaries, Pure and applied geophysics, 117, 1082-1147, 1979.
- 839 McClymont, A.F., Green, A.G., Villamor, P., Horstmeyer, H., Grass, C., and Nobes, D.C.: Characterization of the  
 840 shallow structures of active fault zones using 3-D GPR data, J. geophys. Res., 113, B10315,  
 841 <https://doi.org/10.1029/2007JB005402>, 2008.
- 842 McClymont, A.F., Villamor, P., and Green, A.G.: Fault displacement accumulation and slip rate variability within the  
 843 Taupo Rift (New Zealand) based on trench and 3-D ground-penetrating radar data, Tectonics, 28, TC4005,  
 844 <https://doi.org/10.1029/2008TC002334>, 2009.
- 845 McClymont, A.F., Green, A.G., Kaiser, A., Horstmeyer, H., and Langridge, R.: Shallow fault segmentation of the  
 846 Alpine fault zone, New Zealand revealed from 2- and 3-D GPR surveying, J. Appl. Geophys., 70(4), 343-354,  
 847 <https://doi.org/10.1016/j.jappgeo.2009.08.003>, 2010.
- 848 Michetti, A. M., Ferrelì, L., Serva, L., and Vittori, E.: Geological evidence for strong historical earthquakes in an  
 849 "aseismic" region: The Pollino case (Southern Italy), Journal of Geodynamics, 24:1-4, 67-86,  
 850 [https://doi.org/10.1016/S0264-3707\(97\)00018-5](https://doi.org/10.1016/S0264-3707(97)00018-5), 1997.





- 851 Michetti, A. M., Ferrelì, L., Esposito, E., Porfido, S., Blumetti, A. M., Vittori, E., Serva, L., and Roberts, G. P.: Ground  
 852 Effects during the 9 September 1998, Mw = 5.6 Lauria, Earthquake and the Seismic Potential of the seismic Pollino  
 853 Region in Southern Italy, *Seismological Research Letters*, 71(1), 31-46, <https://doi.org/10.1785/gssrl.71.1.31>, 2000.
- 854 Mogi K.: Two Kinds of Seismic Gaps. In: Wyss M. (eds) *Earthquake Prediction and Seismicity Patterns, Contributions*  
 855 *to Current Research in Geophysics*, Birkhäuser, Basel, [https://doi.org/10.1007/978-3-0348-6430-5\\_4](https://doi.org/10.1007/978-3-0348-6430-5_4), 1979.
- 856 Napolitano, F., De Siena, L., Gervasi, A., Guerra, I., Scarpa, R., and La Rocca, M.: Scattering and absorption imaging  
 857 of a highly fractured fluid-filled seismogenic volume in a region of slow deformation, *Geosci. Front.*, 11(3), 989-  
 858 998, <https://doi.org/10.1016/j.gsf.2019.09.014>, 2020.
- 859 Napolitano, F., Galluzzo, D., Gervasi, A., Scarpa, R., and La Rocca, M.: Fault imaging at Mt Pollino (Italy) from  
 860 relative location of microearthquakes, *Geophysical Journal International*, 224(1), 637-  
 861 648, <https://doi.org/10.1093/gji/ggaa407>, 2021.
- 862 Nobes, D. C., Jol, H. M., and Duffy, B.: Geophysical imaging of disrupted coastal dune stratigraphy and possible  
 863 mechanisms, Haast, South Westland, New Zealand, *New Zealand Journal of Geology and Geophysics*, 59:3, 426-435,  
 864 doi: 10.1080/00288306.2016.1168455, 2016.
- 865 Ogniben, L.: Schema introduttivo alla geologia del confine calabro-lucano, *Mem. Soc. Geol. It.*, 8, 453-763, 1969.
- 866 Overgaard, T. and Jakobsen, P.R.: Mapping of glaciotectionic deformation in an ice marginal environment with ground  
 867 penetrating radar, *Journal Applied Geophysics*, 47(3-4), 191-197, [https://doi.org/10.1016/S0926-9851\(01\)00064-7](https://doi.org/10.1016/S0926-9851(01)00064-7),  
 868 2001.
- 869 Passarelli, L., Hainzl, S., Cesca, S., Maccaferri, F., Mucciarelli, M., Roessler, D., Corbi, F., Dahm, T., Rivalta, E.:  
 870 Aseismic transient driving the swarm-like seismic sequence in the Pollino range, Southern Italy, *Geophysical Journal*  
 871 *International*, 201:3, 1553–1567, <https://doi.org/10.1093/gji/ggv111>, 2015.
- 872 Pantosti, D. and Valensise, G.: Faulting mechanism and complexity of the November 23, 1980, Campania-Lucania  
 873 earthquake, inferred from surface observations, *J. Geophys. Res.*, 95(B10), 15,319-15,341,  
 874 <https://doi.org/10.1029/JB095iB10p15319>, 1990.
- 875 Pastori, M., Margheriti, L., De Gori, P., Govoni, A., Lucente, F.P., Moretti, M., Marchetti, A., Di Giovambattista, R.,  
 876 Anselmi, M., De Luca, P., Nardi, A., Agostinetti, N.P., Latorre, D., Piccinini, D., Passarelli, L., and Chiarabba, C.:  
 877 The 2011–2014 Pollino Seismic Swarm: Complex Fault Systems Imaged by 1D Refined Location and Shear Wave  
 878 Splitting Analysis at the Apennines–Calabrian Arc Boundary, *Front. Earth Sci.*, 9:618293, doi:  
 879 10.3389/feart.2021.618293, 2021.
- 880 Patacca, E. and Scandone, P.: Geological interpretation of the CROP-04 seismic line (Southern Apennines, Italy),  
 881 *Boll. Soc. Geol. It. (Ital. J. Geosci.)*, 7, 297-315, 2007.
- 882 Pauselli, C., Federico, C., Frigeri, A., Orosei, R., Barchi, M.R., and Basile, G.: Ground Penetrating Radar  
 883 investigations to study active faults in the Norcia Basin (Central Italy), *J. Appl. Geophys.*, 72, 39-45,  
 884 <https://doi.org/10.1016/j.jappgeo.2010.06.009>, 2010.
- 885 Pauselli, C., Ercoli, M., Volpe, R., Federico, C., Mazzocca, M., and Speziali, L.: 2D and 3D GPR images of selected  
 886 fault planes (Calabro-Lucania border), Report DPC-INGV-S1 Project "Base-knowledge improvement for assessing  
 887 the seismogenic potential of Italy", deliverable D18/c1.1 - (<https://sites.google.com/site/ingvdpcprojects1/home>,  
 888 Agreement INGV-DPC 2014-2015), 49 pp., 2015.
- 889 Plafker, G. and Galloway, J. P.: Lessons Learned from the Lorna Prieta, California, Earthquake of October 17, 1989,  
 890 USGS Numbered Series Circular 1045, 48 pp., <https://doi.org/10.3133/cir1045>, 1989.



891 Pondrelli, S.: European-Mediterranean Regional Centroid-Moment Tensors Catalog (RCMT) [Data set], Istituto  
 892 Nazionale di Geofisica e Vulcanologia (INGV), <https://doi.org/10.13127/rcmt/euromed>, <http://rcmt2.bo.ingv.it/>, 2002.

893 Pondrelli, S., Salimbeni, S., Ekström, G., Morelli, A., Gasperini, P., and Vannucci, P.: The Italian CMT dataset from  
 894 1977 to present, *Phys. Earth Plan. Int.*, 159, 286-303, 2006.

895 Porreca, M., Minelli, G., Ercoli, M., Brobia, A., Mancinelli, P., Cruciani, F., Giorgetti, C., Carboni, F., Mirabella, F.,  
 896 Cavinato, G., Cannata, A., Pauselli, C., and Barchi, M.R.: Seismic reflection profiles and subsurface geology of the  
 897 area interested by the 2016-2017 earthquake sequence (Central Italy), in: *The 2016 Central Italy Seismic Sequence:  
 898 Insights, implications and lessons learned*, *Tectonics*, 37, 1116-1137, <https://doi.org/10.1002/2017TC004915>, 2018.

899 Pousse-Beltran, L., Vassallo, R., Audemard, F., Jouanne, F., Oropeza, J., Garambois, S., and Aray, J.: Earthquake  
 900 geology of the last millennium along the Boconó Fault, Venezuela, *Tectonophysics*, 747-748, 40-53,  
 901 <https://doi.org/10.1016/j.tecto.2018.09.010>, 2018.

902 Pucci, S., De Martini, P. M., Civico, R., Villani, F., Nappi, R., Ricci, T. et al., and Pantosti, D.: Coseismic ruptures of  
 903 the 24 August 2016, Mw 6.0 Amatrice earthquake (central Italy), *Geophysical Research Letters*, 44, 2138-2147,  
 904 <https://doi.org/10.1002/2016GL071859>, 2017.

905 Quitzow, H.W.: Derdeckenbaudes Kalabrischenmassivs und seiner Randgebiete, *Abh. Ges. Wiss. Göttingen, Math  
 906 Phys. Kl.*, 13, 63-179, 1935.

907 Reiss, S., Reicherter, K. R., and Reuther, C. D.: Visualization and characterization of active normal faults and  
 908 associated sediments by high-resolution GPR Geological Society, London, Special Publications, 211, 247-255,  
 909 doi:10.1144/GSL.SP.2001.211.01.20, 2003.

910 Roberts, G.P., Raithatha, B., Sileo, G., Pizzi, A., Pucci, S., Walker, J.F., et al.: Shallow subsurface structure of the  
 911 2009 April 6 Mw 6.3 L'Aquila earthquake surface rupture at Paganica, investigated with ground-penetrating radar,  
 912 *Geophys. J. Int.*, 183(2), 774-790, <https://doi.org/10.1111/j.1365-246X.2010.04713.x>, 2010.

913 Rovida, A., Locati, M., Camassi, R., Lolli, B., and Gasperini, P.: The Italian earthquake catalogue CPTI15, *Bulletin  
 914 of Earthquake Engineering*, 18, 2953-2984, <https://doi.org/10.1007/s10518-020-00818-y>, 2020.

915 Salvi, S., Cinti, F.R., Colini, L., D'Addezio, G., Doumaz, F., and Pettinelli, E.: Investigation of the active Celano-  
 916 L'Aquila fault system, Abruzzi (central Apennines, Italy) with combined ground-penetrating radar and palaeoseismic  
 917 trenching, *Geophys. J. Int.*, 155(3), 805-818, <https://doi.org/10.1111/j.1365-246X.2003.02078.x>, 2003.

918 Sangree, J., B. and Widmier, J. M.: Interpretation of depositional facies from seismic data, *Geophysics*, 44, 131-60,  
 919 <https://doi.org/10.1190/1.1440957>, 1979.

920 Schiattarella, M., Torrente, M., and Russo, F.: Analisi strutturale ed osservazioni morfotettoniche nel bacino del  
 921 Mercure (Confine calabro-lucano), *Il Quaternario*, 7, 613-626, 1994.

922 Scognamiglio, L., Tinti, E., and Quintiliani, M.: Time Domain Moment Tensor (TDMT) [Data set], Istituto Nazionale  
 923 di Geofisica e Vulcanologia (INGV), <https://doi.org/10.13127/TDMT>, <http://terremoti.ingv.it/tdmt>, 2006.

924 Servizio Geologico d'Italia: 220 Verbicaro and 221 Castrovillari Sheets of the Carta Geologica D'Italia, 1: 100.000  
 925 Scale, Rome, 1970.

926 Shaikh, M.A., Maurya, D.M., Mukherjee, S., Vanik, N.P., Padmalal, A., and Chamyal, L.S.: Tectonic evolution of the  
 927 intra-uplift Vigodi-Gugriana-Khirsara-Netra Fault System in the seismically active Kachchh rift basin, India:  
 928 Implications for the western continental margin of the Indian plate, *Journal of Structural Geology*, 140, 104124,  
 929 <https://doi.org/10.1016/j.jsg.2020.104124>, 2020.



- 930 Sketsiou, P., De Siena, L., Gabrielli, S., Napolitano, F., 3-D attenuation image of fluid storage and tectonic interactions  
 931 across the Pollino fault network, *Geophysical Journal International*, 226:1, 536–547,  
 932 <https://doi.org/10.1093/gji/ggab109>
- 933 Slater, L. and Niemi, T.M.: Ground-penetrating radar investigation of active faults along the Dead Sea Transform and  
 934 implications for seismic hazards within the city of Aqaba, Jordan, *Tectonophysics*, 368(1-4), 33-50,  
 935 [https://doi.org/10.1016/S0040-1951\(03\)00149-5](https://doi.org/10.1016/S0040-1951(03)00149-5), 2003.
- 936 Smith, D. G. and Jol, H. M.: Wasatch fault (Utah), detected and displacement characterized by ground penetrating  
 937 radar, *Environ. Eng. Geosci.*, 1, 489-496, 1995.
- 938 Spina, V., Galli, P., Tondi, E., and Mazzoli, S.: Fault propagation in a seismic gap area (northern Calabria, Italy):  
 939 implications for seismic hazard, *Tectonophysics*, 476, 357-369, 2009.
- 940 Stirling, M., Goded, T., Berryman, K., and Litchfield, N.: Selection of Earthquake Scaling Relationships for Seismic-  
 941 Hazard Analysis, *Bulletin of the Seismological Society of America*, 103(6), 2993-  
 942 3011, <https://doi.org/10.1785/0120130052>, 2013.
- 943 Tangari, A.C., Scarciglia, F., Piluso, E., Marinangeli, L., and Pompilio, L.: Role of weathering of pillow basalt,  
 944 pyroclastic input and geomorphic processes on the genesis of the Monte Cerviero upland soils (Calabria, Italy), *Catena*,  
 945 171, 299-315, ISSN 0341-8162, <https://doi.org/10.1016/j.catena.2018.07.015>, 2018.
- 946 Tarquini, S., Vinci, S., Favalli, M., Doumaz, F., Fornaciai, A. and Nannipieri, L.: Release of a 10-m-resolution DEM  
 947 for the Italian territory: Comparison with global-coverage DEMs and anaglyph-mode exploration via the web,  
 948 *Computers & Geosciences*, 38, 168-170, <https://doi.org/10.1016/j.cageo.2011.04.018>, 2012.
- 949 Tertulliani A. and Cucci, L.: New insights on the strongest historical earthquake in the Pollino region (southern Italy),  
 950 *Seismol. Res. Lett.*, 85(3), 743-751, <https://doi.org/10.1785/0220130217>, 2014.
- 951 Testa, A., Boncio, P., Di Donato, M., Mataloni, G., Brozzetti, F., and Cirillo, D.: Mapping the geology of the 2016  
 952 Central Italy earthquake fault (Mt. Vettore – Mt. Bove fault, Sibillini Mts.): geological details on the Cupi – Ussita  
 953 and Mt. Bove - Mt. Porche segments and overall pattern of coseismic surface faulting, *Geological Field Trips and*  
 954 *Maps*, Italian Geological Society and of the Geological Survey of Italy, 11(2.1), 1-13,  
 955 <https://doi.org/10.3301/GFT.2019.03>, 2019.
- 956 Tortorici, L., Monaco, C., Tansi, C., and Cocina, O.: Recent and active tectonics in the Calabrian arc (Southern Italy),  
 957 *Tectonophysics*, 243(1-2), pp. 37–55, [https://doi.org/10.1016/0040-1951\(94\)00190-K](https://doi.org/10.1016/0040-1951(94)00190-K), 1995.
- 958 Totaro, C., Koulakov, I., Orecchio, B., and Presti, D.: Detailed crustal structure in the area of the southern Apennines–  
 959 Calabrian Arc border from local earthquake tomography, *J. Geodyn.*, 82, 87-97,  
 960 <https://doi.org/10.1016/j.jog.2014.07.004>, 2014.
- 961 Totaro, C., Seeber, L., Waldhauser, F., Steckler, M., Gervasi, A., Guerra, I., Orecchio, B., and Presti, D.: An intense  
 962 earthquake swarm in the southernmost Apennines: fault architecture from high-resolution hypocenters and focal  
 963 mechanisms, *Bull. Seismol. Soc. Am.* 105, 1-6, <https://doi.org/10.1785/0120150074>, 2015.
- 964 Troncke, J., Villamor, P., and Green, A. G.: Detailed shallow geometry and vertical displacement estimates of the  
 965 Maleme Fault Zone, New Zealand, using 2D and 3D georadar, *Near Surface Geophysics*, 4(3), 155-161,  
 966 <https://doi.org/10.3997/1873-0604.2005041>, 2006.
- 967 Utzi, E. C.: *Ground Penetrating Radar*, Elsevier, 209 pp., <http://dx.doi.org/10.1016/B978-0-08-102216-0.00001-1>,  
 968 2017.



- Wallace, S. C., Nobes, D. C., Davis, K. J., Burbank, D. W., and White, A.: Three-dimensional GPR imaging of the Benmore anticline and step-over of the Ostler Fault, South Island, New Zealand, *Geophysical Journal International*, 180(2), 465-474, <https://doi.org/10.1111/j.1365-246X.2009.04400.x>, 2010.
- Vanneste, K., Verbeeck, K., and Petermans, T.: Pseudo-3-D imaging of a low-slip-rate, active normal fault using shallow geophysical methods: the Geleen fault in the Belgian Mass River valley, *Geophysics*, 73(1), B1-B9, <https://doi.org/10.1190/1.2816428>, 2008.
- Wells, D.L. and Coppersmith, K.J.: New empirical relationships among magnitude, rupture length, rupture width, rupture area, and surface displacement, *Bull. Seismol. Soc. Am.*, 84(4), 974-1002, 1994.
- Wesnowsky, S.G.: Displacement and geometrical characteristics of earthquake surface ruptures: Issues and implications for seismic hazard analysis and the process of earthquake rupture, *Bull. Seismol. Soc. Am.*, 98(4), 1609-1632, <https://doi.org/10.1785/0120070111>, 2008.
- Vezzani, L., Festa, A., and Ghisetti, F.C.: Geology and tectonic evolution of the Central-Southern Apennines, Italy, *Special Paper of the Geological Society of America*, 469, 1-58, <https://doi.org/10.1130/SPE469>, 2010.
- Villani, F. and Pierdominici, S.: Late Quaternary tectonics of the Vallo di Diano basin (southern Apennines, Italy), *Quat. Sci. Rev.*, 29, 3167-3183, <https://doi.org/10.1016/j.quascirev.2010.07.003>, 2010.
- Villani, F., Pucci, S., Civico, R., De Martini, P. M., Cinti, F. R., and Pantosti, D.: Surface faulting of the 30 October 2016 Mw 6.5 central Italy earthquake: Detailed analysis of a complex coseismic rupture, *Tectonics*, 37, 3378-3410, <https://doi.org/10.1029/2018TC005175>, 2018.
- ~~Vittori, E., Deiana, G., Esposito, E., Ferrelli, L., Marchegiani, L., Mastrolorenzo, G., Michetti, A.M., Porfido, S., Serva, L., Simonelli, A.L., and Tondi, E.: Ground effects and surface faulting in the September-October 1997 Umbria-Marche (Central Italy) seismic sequence, *J. Geodyn.*, 29, 535-564, [https://doi.org/10.1016/S0264-3707\(99\)00056-3](https://doi.org/10.1016/S0264-3707(99)00056-3), 2000.~~
- Yalciner, C.C., Altunel, E., Bano, M., Meghraoui, M., Karabacak, V., and Akyuz, H. S.: Application of GPR to normal faults in the Büyük Menderes Graben, Western Turkey, *Journal of Geodynamics*, 65, 218-227, <https://doi.org/10.1016/j.jog.2012.05.011>, 2013.
- Zajc, M., Celarc, B., and Gosar, A.: GPR Study of a Thrust-Fault in an Active Limestone Quarry (SW Slovenia), *JEEG*, 23(4), 457-468: <https://doi.org/10.2113/JEEG23.4.457>, 2018.
- Zhang, D., Li, J., Liu, S., and Wang, G.: Multi-frequencies GPR measurements for delineating the shallow subsurface features of the Yushu strike slip fault, *Acta Geophys.*, 67, 501-515, <https://doi.org/10.1007/s11600-019-00271-9>, 2019.



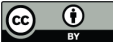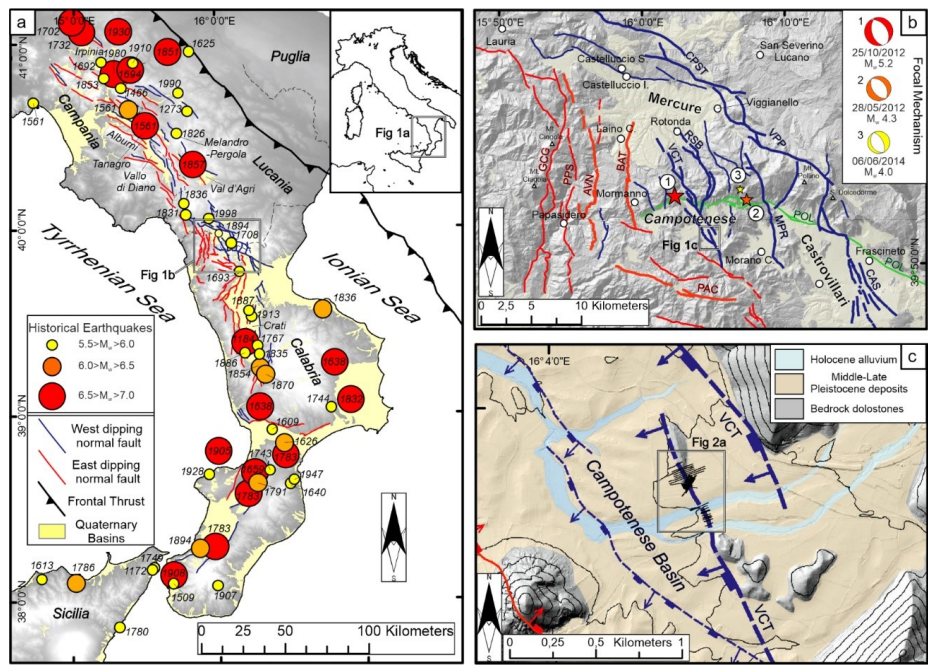

Figure 1

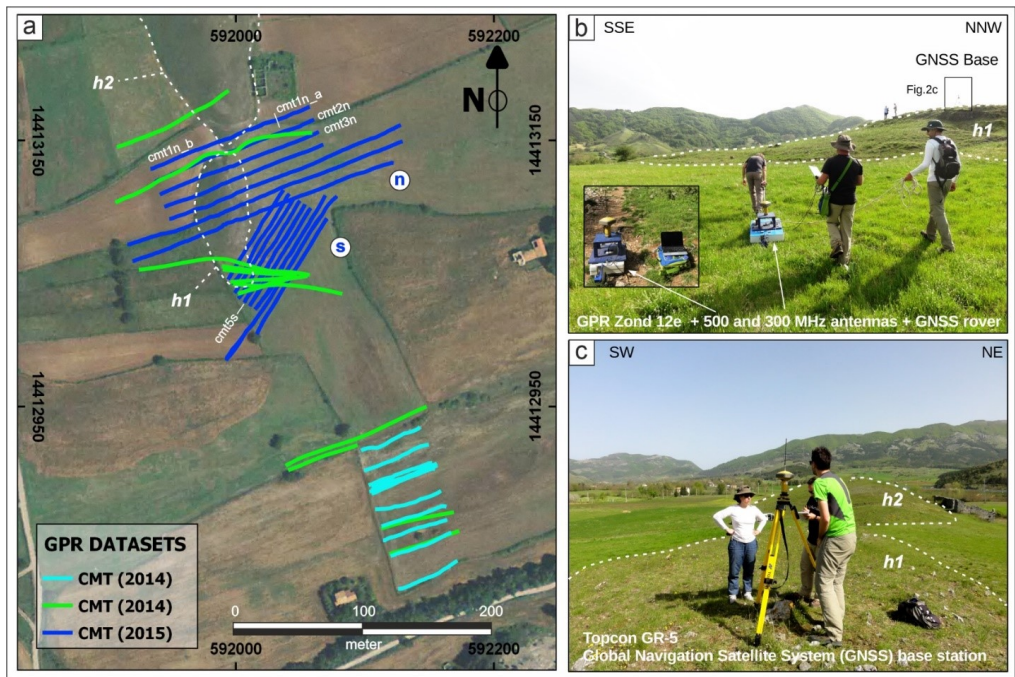

Figure 2

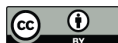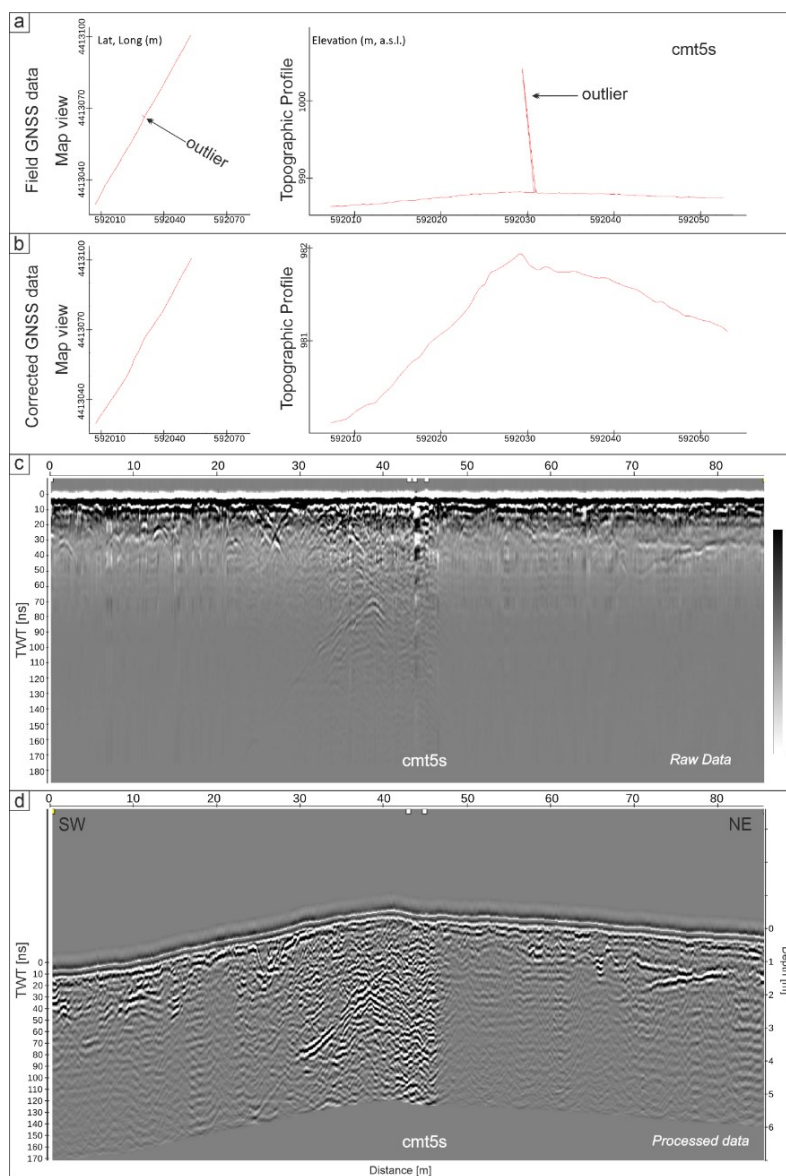

Figure 3

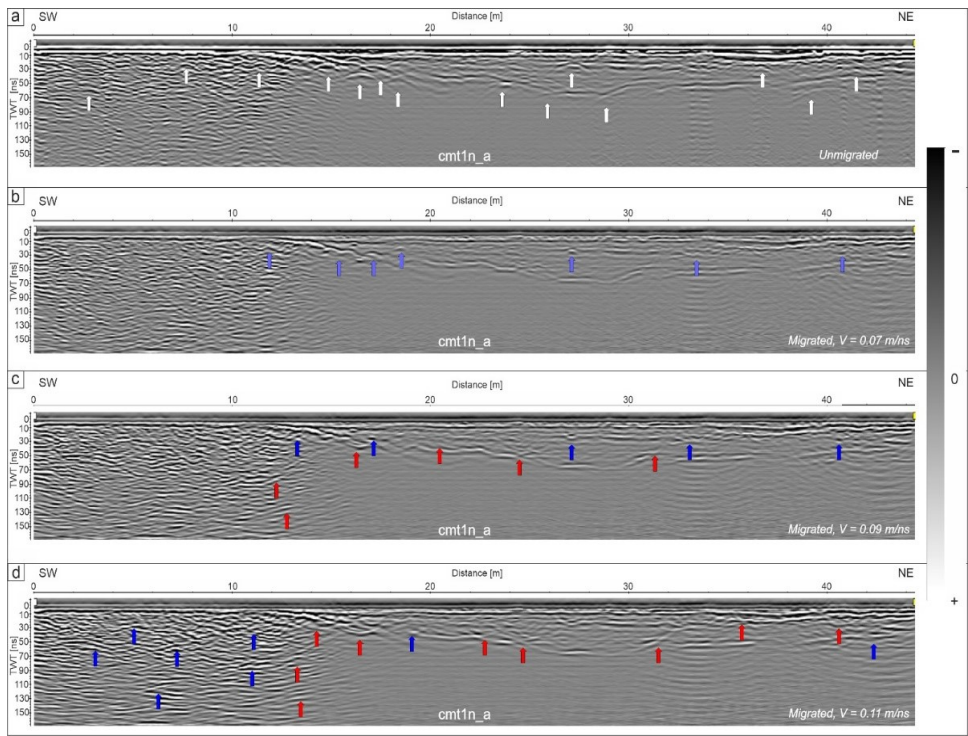

Figure 4

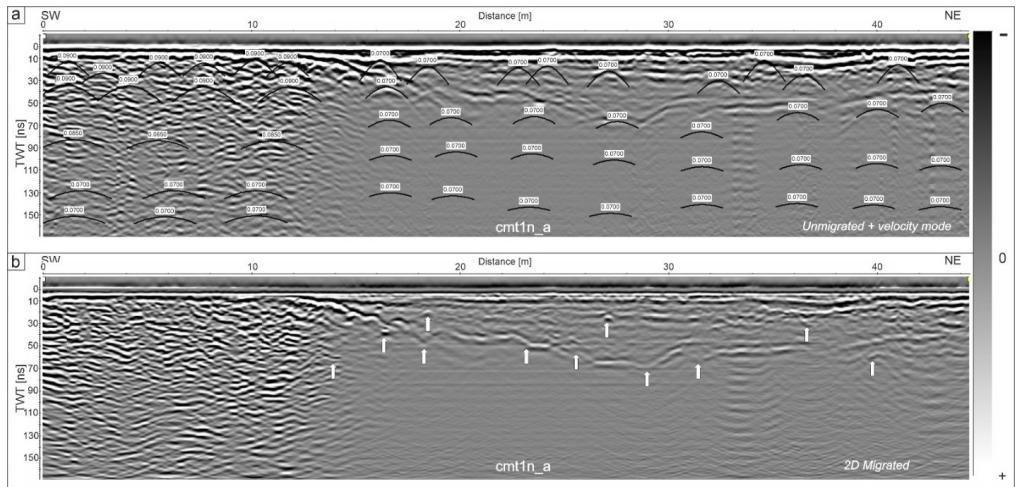

Figure 5



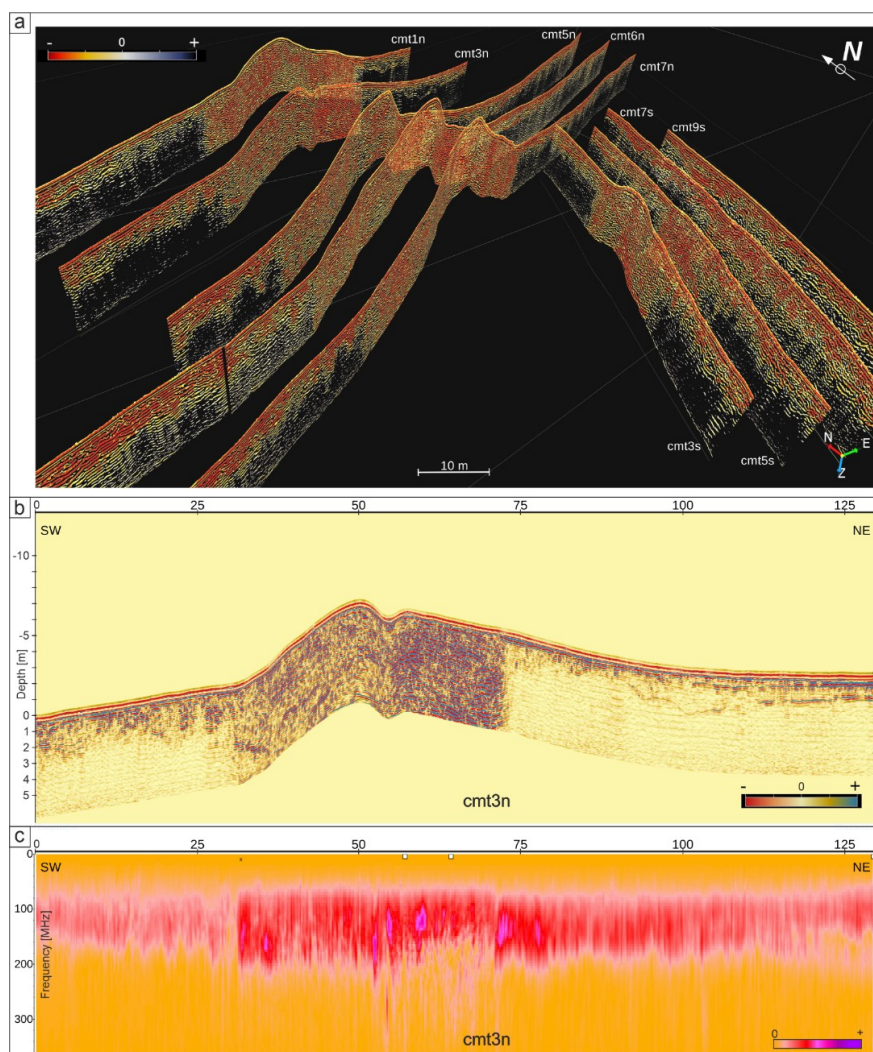

Figure 6

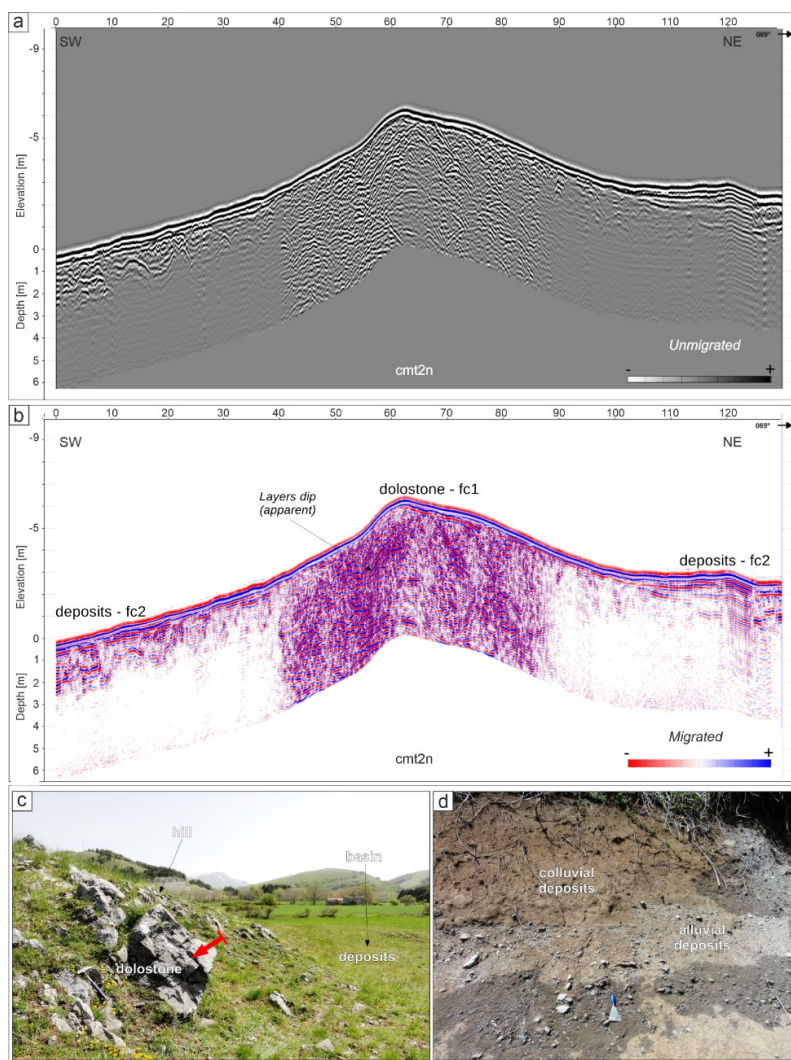

Figure 7

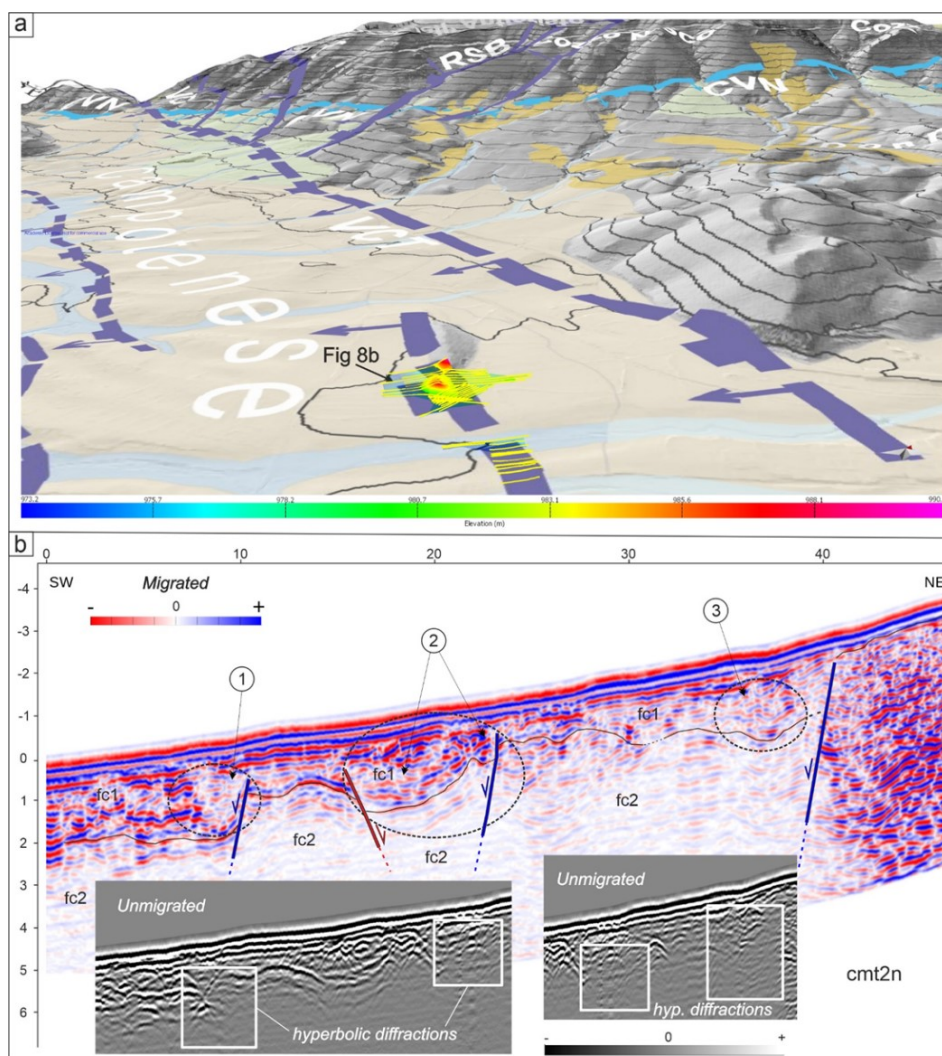

Figure 8

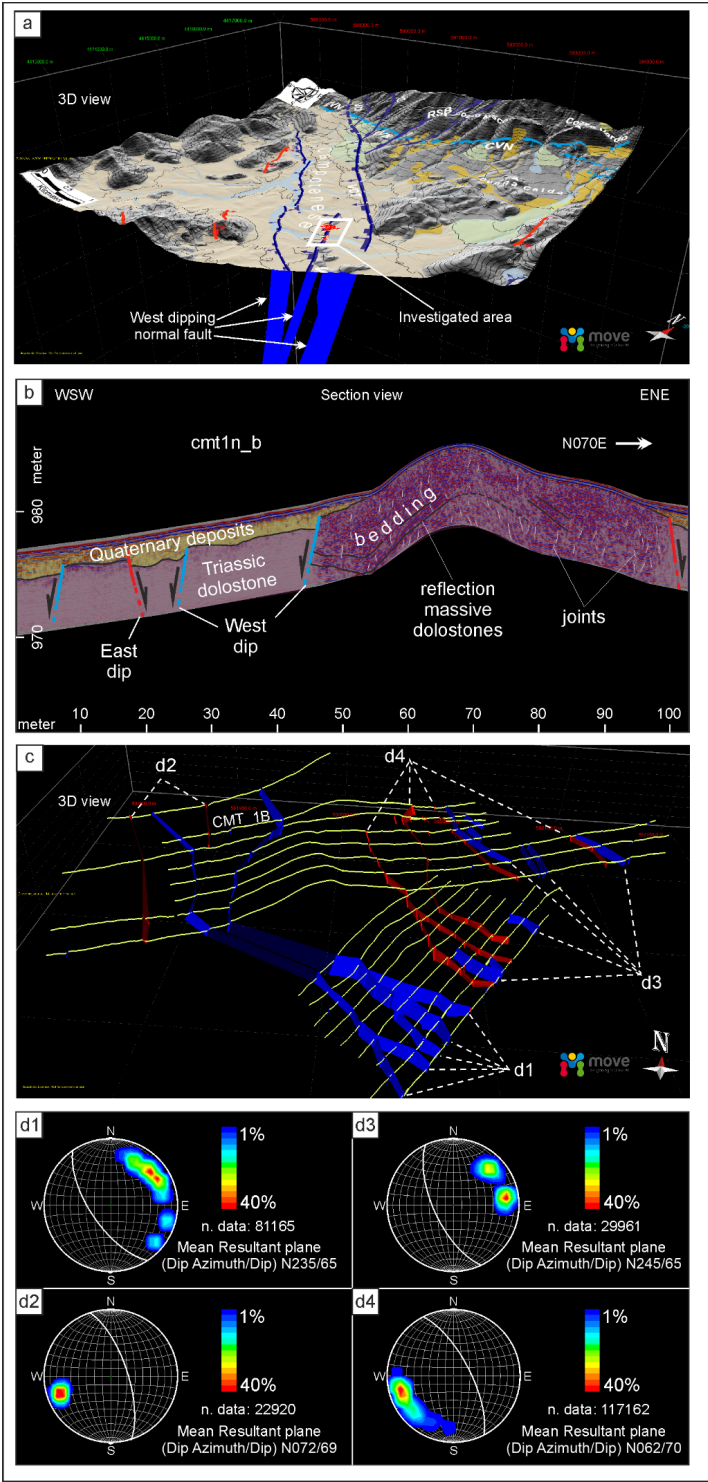

Figure 9

1015  
1016





1017

**Table 1**

| GPR survey information and parameters |                          |             |
|---------------------------------------|--------------------------|-------------|
| Antenna frequency (MHz)               | 300 (preferred)          | 500         |
| Number of acquired profiles           | 45                       | 4           |
| Total profile length (m)              | 3789.5/4153              | 363.5/4153  |
| Profile distance (m)                  | 10 and 25 (in g1 and g2) | not regular |
| Traces distance (m)                   | 0.05                     | 0.02        |
| Number of samples                     | 1024                     | 512         |
| Time window (ns)                      | 300-200*                 | 200-100*    |

1018

**Table 2**

| Processing Flow                                          | Parameters<br>(300 MHz)                                                  | Parameters<br>(500 MHz)                                               |
|----------------------------------------------------------|--------------------------------------------------------------------------|-----------------------------------------------------------------------|
| Trace editing, coordinates editing<br>and corrections    | -                                                                        | -                                                                     |
| Time-zero correction                                     | -                                                                        | -                                                                     |
| Dewow (ns)                                               | 10                                                                       | 5                                                                     |
| Amplitude recovery function:<br>$g(t)=(1+a*t)*e^{(b*t)}$ | linear: 0.5 (2014) & 1.2<br>(2015) exponent: 0.15<br>(2014) & 0.6 (2015) | linear: 0.5 (2014) & 1.2 (2015)<br>exponent: 0.15 (2014) & 0.6 (2015) |
| Velocity analysis                                        | Diffraction hyperbola<br>fitting                                         | Diffraction yperbola fitting                                          |
| Background removal (ns)                                  | Applied from 5 ns to end<br>(computed on all the traces)                 | Applied from 5 ns to end<br>(computed on all the traces)              |
| Bandpass filter (MHz)                                    | 32/96/650/700                                                            | 64/112/750/800                                                        |
| F-K filter                                               | customized                                                               | customized                                                            |
| Time migration (2D Kirchhoff)                            | 2D velocity models                                                       | 2D velocity models                                                    |
| Topographic correction                                   | GNSS/GIS Elevations                                                      | GNSS/GIS Elevations                                                   |
| Time-depth conversion<br>(Quaternary deposits)           | $v = 0,7 \text{ m/ns}$                                                   | $v = 0,7 \text{ m/ns}$                                                |

1019

1020

# 1021 **Figures and Tables captions:**

1022 **Figure 1 - Location maps of the study site (DTM sources: TINITALY by Tarquini et al., 2012 and by Regione**  
 1023 **Calabria - [www.regione.calabria.it](http://www.regione.calabria.it), under license IODL 2.0. - <https://www.dati.gov.it/iodl/2.0/>): a) the image**  
 1024 **illustrates the southern Italian peninsula with the regional faults pattern and the historical strong earthquakes;**  
 1025 **b) map showing the studied region with local faults, and the detailed location of the three historical seismic**  
 1026 **events (stars); c) detailed location of the GPR survey area within the Campotenese Quaternary basin crossing**  
 1027 **a possible VCT fault splay.**



Figure 2 - GPR acquisition campaigns: **a)** GPR grids collected at the study site during the three field visits (aerial image source: Regione Calabria - [www.regione.calabria.it](http://www.regione.calabria.it), under license IODL 2.0. - <https://www.dati.gov.it/iodl/2.0/>); **b)** acquisition phase using the 300 and 500 MHz antennae (in the insert) and GNSS receiver used for accurate data positioning; c) GNSS base station set up during the fieldwork.

Figure 3: Topographic correction of GPR profiles: **a)** example of accuracy degradation of GNSS data, displaying an outlier both in map view and in topographic profile, on which the positioning error is considerable; **b)** GNSS coordinates and topographic profile after the correction; c) raw GPR section displaying high reflectivity in the central sector; d) example of full processed profile with topography displaying various reflection patterns encompassing dipping reflections and diffractions. Vertical exaggeration is 4.

Figure 4: Migration tests performed during the GPR data processing: **a)** unmigrated 2D GPR profile, 300 MHz antennae; **b)** migrated profile using a constant velocity  $v = 0.07$  m/ns, light-blue arrows indicate good diffractions collapse; c) migration output obtained with a constant velocity  $v = 0.09$  m/ns, with dark-blue arrows suggesting good migration results (migration artefacts are shown by red arrows); d) migration results using a constant velocity  $v = 0.11$  m/ns, with dark-blue arrows highlighting good hyperbolas collapse, particularly within the high reflective unit; red arrows highlight clear migration smiles.

Figure 5: Example of 2D time-migration of radar profiles: **a)** example of hyperbolic diffractions fitting used for 2D velocity model building; a constant velocity value has been assumed in deeper no-diffraction areas for interpolation purposes; **b)** 2D time-migration results, highlighting the good performance of the process, which collapsed the hyperbolic diffractions and restored reliable reflection geometry.

Figure 6: GPR data visualization: **a)** fence diagram showing the three-dimensional location of some representative GPR profiles in the northern sector of the study site; **b)** bidimensional GPR profile displaying the central high reflective sector and dipping reflections across the hill; c) spatial variation of a 2D amplitude-frequency spectrum linked to variable physical properties of media along the profile. **Vertical exaggeration is 4.**

Figure 7: Correlation between GPR profiles and outcropping geology at the study site: **a)** unmigrated 300 MHz profile displaying numerous hyperbolic diffractions; **b)** migrated profile displaying the apparent vs true layer dip associated to fractured dolostone formation (facies fc1) and Quaternary deposits in attenuated sectors (GPR facies fc2); **c)** Triassic Dolostone formation outcropping on the hill (red arrow indicates the bedding) and nearby Quaternary deposits of the basin; d) an example of Quaternary colluvial and alluvial deposits outcropping nearby the survey site. **Vertical exaggeration is 2.5.**

Figure 8: GPR data interpretation: **a)** three-dimensional image of the surveyed area, displaying the Dolostone outcrops bounding the basin and the surveyed hill. The coloured surface represents the interpolated horizon reconstructed after the picking of the interpreted Dolostone top reflection (DTM source: Regione Calabria - [www.regione.calabria.it](http://www.regione.calabria.it), under license IODL 2.0. - <https://www.dati.gov.it/iodl/2.0/>); **b)** migrated radar profile with the main interpreted fault splays and related sedimentary structures within the Quaternary deposits (detail of unmigrated data in the two grey inserts): 1) semi-continuous and sub-horizontal reflections (fc1, Quaternary deposits) onlapping the lower boundary (Dolostone top, black line above fc2); reflections package thickening and truncation with localized attenuation, which suggest the presence of a **colluvial-wedge** close to a W-dip normal fault ( $\sim 0.6$  m vertical offset); 2) mode discontinuous, from subparallel to wavy reflections package (fc1) downlapping the lower Dolostone top boundary; the asymmetric, truncated reflectors thickening is bounded by two possible conjugate normal fault strands ( $\sim 0.5$  m offset) displacing both fc1 and fc2; 3) contorted reflections package with limited continuity, displaying thickening, truncation and distributed attenuation, suggesting **colluvial wedge** deposits lying above fc2 close to a fault zone with a W-dip normal fault ( $\sim 0.8$  m vertical offset). **Vertical exaggeration is 2.**

Figure 9: Results of the three-dimensional analysis and interpretation performed on the entire GPR dataset: **a)** 3D structural model inferred **after the geological mapping at the scale of the basin** (DTM sources: TINITALY by Tarquini et al., 2012 and by Regione Calabria - [www.regione.calabria.it](http://www.regione.calabria.it), under license IODL 2.0. - <https://www.dati.gov.it/iodl/2.0/>); **b)** GPR section view with interpretation including **synthetic** and antithetic fault splays; **c)** detailed structural scratch of faults obtained by the analysis and correlation across the entire GPR dataset d) synthetic stereo-net plots of the fault planes in c), reporting the mean Dip Azimuth / Dip angle extracted for the identified four main sets of discontinuities, with a Dip Azimuth ranging between N 235-245° and N 062-072° for the ~~for the~~ west-dipping and East-dipping normal faults, respectively. **Vertical exaggeration is 2.**

Table 1: Main information and GPR parameters used during the data collection (\* the time window was adapted depending on the surveyed area).

Table 2: Customized flow and details of the parameters used during the processing of the GPR dataset.
